1  
2  
3  
4  
5  
6  
7  
8  
9  
10  
11  
12  
13  
14  
15  
16  
17  
18  
19  
20  
21  
22  
23

**A single-cell atlas of the mouse and human prostate reveals heterogeneity and conservation of epithelial progenitors**

Laura Crowley<sup>1,2,3,4,7,10</sup>, Francesco Cambuli<sup>1,2,3,4,7,10</sup>, Luis Aparicio<sup>4,5,7,10</sup>, Maho Shibata<sup>1,2,3,4,7,9</sup>, Brian D. Robinson<sup>8</sup>, Shouhong Xuan<sup>1,2,3,4,7</sup>, Weiping Li<sup>1,2,3,4,7</sup>, Hanina Hibshoosh<sup>6,7</sup>, Massimo Loda<sup>8</sup>, Raul Rabadan<sup>4,5,7,11</sup>, and Michael M. Shen<sup>1,2,3,4,7,11</sup>

<sup>1</sup>Department of Medicine, <sup>2</sup>Department of Genetics and Development, <sup>3</sup>Department of Urology, <sup>4</sup>Department of Systems Biology, <sup>5</sup>Department of Biomedical Informatics, <sup>6</sup>Department of Pathology and Cell Biology, <sup>7</sup>Herbert Irving Comprehensive Cancer Center, Columbia University Irving Medical Center, New York, NY 10032, USA

<sup>8</sup>Department of Pathology and Laboratory Medicine, Weill Medical College of Cornell University, New York, NY 10021, USA

<sup>9</sup>Present address: Department of Anatomy and Cell Biology, School of Medicine and Health Sciences, The George Washington University Cancer Center, The George Washington University, Washington, DC 20052, USA

<sup>10</sup>Authors made equal contributions

<sup>11</sup>Correspondence: [rr2579@cumc.columbia.edu](mailto:rr2579@cumc.columbia.edu), [mshen@columbia.edu](mailto:mshen@columbia.edu)

## 24 **Summary**

25           **Understanding the cellular constituents of the prostate is essential for identifying the**  
26 **cell of origin for benign prostatic hyperplasia and prostate adenocarcinoma. Here we**  
27 **describe a comprehensive single-cell atlas of the adult mouse prostate epithelium, which**  
28 **demonstrates extensive heterogeneity. We observe distinct lobe-specific luminal epithelial**  
29 **populations (LumA, LumD, LumL, and LumV) in the distal region of the four prostate lobes,**  
30 **a proximally-enriched luminal population (LumP) that is not lobe-specific, as well as a**  
31 **periurethral population (PrU) that shares both basal and luminal features. Functional**  
32 **analyses suggest that LumP and PrU cells have multipotent progenitor activity in organoid**  
33 **formation and tissue reconstitution assays. Furthermore, we show that mouse distal and**  
34 **proximal luminal cells are most similar to human acinar and ductal populations, that a PrU-**  
35 **like population is conserved between species, and that the mouse lateral prostate is most**  
36 **similar to the human peripheral zone. Our findings elucidate new prostate epithelial**  
37 **progenitors, and help resolve long-standing questions about the anatomical relationships**  
38 **between the mouse and human prostate.**

39

40

41           The significant anatomical differences between the mouse and human prostate have long  
42 hindered analyses of mouse models of prostate diseases. The mouse prostate can be separated into  
43 anterior (AP), dorsal (DP), lateral (LP), and ventral (VP) lobes; the mouse dorsal and lateral lobes  
44 are often combined as the dorsolateral prostate (DLP) (Cunha et al., 1987; Shappell et al., 2004;  
45 Shen and Abate-Shen, 2010). In contrast, the human prostate lacks defined lobes, and instead is  
46 divided into different histological zones (central, transition, and peripheral); the peripheral zone  
47 represents the predominant site of prostate adenocarcinoma, whereas benign prostatic hyperplasia  
48 (BPH) occurs in the transition zone (Cunha et al., 2018; Ittmann, 2018; Shappell et al., 2004).  
49 Moreover, unlike the mouse, the human prostate has distinct ductal and acinar regions. Although  
50 microarray gene expression profiling has suggested that the DLP is most similar to the human  
51 peripheral zone (Berquin et al., 2005), there is no consensus on the relationship between mouse  
52 lobes and human zones (Ittmann, 2018; Ittmann et al., 2013; Shappell et al., 2004).

53           The adult prostate epithelium is comprised of luminal, basal, and rare neuroendocrine cells  
54 (Shen and Abate-Shen, 2010; Toivanen and Shen, 2017), and cellular heterogeneity has been  
55 suggested within the luminal (Barros-Silva et al., 2018; Chua et al., 2014; Karthaus et al., 2020;  
56 Karthaus et al., 2014; Kwon et al., 2016; Liu et al., 2016) and basal compartments (Goldstein et  
57 al., 2008; Lawson et al., 2007; Wang et al., 2020). Lineage-tracing analyses have shown that the  
58 hormonally-intact adult prostate epithelium is maintained by unipotent progenitors within the basal  
59 and luminal epithelial compartments (Choi et al., 2012; Lu et al., 2013; Wang et al., 2013).  
60 However, following tissue dissociation, both basal and luminal cells can act as bipotent progenitors  
61 in organoid or tissue reconstitution assays (Chua et al., 2014; Karthaus et al., 2014). The progenitor  
62 properties of basal cells may reflect their ability to generate luminal progeny during tissue repair  
63 after wounding or inflammation (Kwon et al., 2014; Toivanen et al., 2016), but the role of  
64 presumptive luminal progenitors has been less clear. In particular, several studies have suggested  
65 increased progenitor potential in the proximal region of the prostate (nearest to the urethra) (Burger  
66 et al., 2005; Goto et al., 2006; Tsujimura et al., 2002), particularly for proximal luminal cells

67 (Karthaus et al., 2020; Kwon et al., 2016; Wei et al., 2019; Zhang et al., 2018). However, the nature  
68 and distribution of these epithelial populations have been poorly characterized.

### 69 **Distinct luminal epithelial populations in the mouse prostate**

70 To examine cellular heterogeneity, we performed single-cell RNA-sequencing of whole  
71 prostates from adult wild-type mice at 10 weeks of age. We microdissected the full proximal-distal  
72 extent of each prostate lobe down to its junction with the urethral epithelium (Figure 1—figure  
73 supplement 1A-C). We noted that the anterior (AP), dorsal (DP), and lateral (LP) lobes joined the  
74 urethra in close proximity on the dorsal side, whereas the ventral lobe (VP) had a distinct junction  
75 ventrally. As previously described (Cunha et al., 1987; Shappell et al., 2004; Shen and Abate-  
76 Shen, 2010), each lobe has a characteristic morphology, pattern of ductal branching, and  
77 histological appearance (Figure 1—figure supplement 1D-F).

78 To analyze these datasets, we applied *Randomly*, an algorithm that uses random matrix  
79 theory to reduce noise in single-cell datasets (Aparicio et al., 2020). Using the universality property  
80 of random matrix theory on eigenvalues and eigenvectors of sparse matrices, *Randomly*  
81 discriminates biological signals from noise and sparsity-induced confounding signals (which  
82 typically comprise approximately 98% of the data, based on a survey of published single-cell  
83 datasets) (Aparicio et al., 2020). Processing by *Randomly* facilitated the identification of cell  
84 populations with distinct transcriptional signatures (Figure 1—figure supplement 2). As visualized  
85 in an aggregated dataset composed of 5,288 cells from two whole prostates, we found distinct  
86 luminal, basal, and neuroendocrine populations that were annotated based on the expression of  
87 marker genes (Figure 1A). Notably, we could identify five different luminal epithelial populations,  
88 a single basal population, rare neuroendocrine cells, and a small population of epithelial cells that  
89 expresses both basal and luminal markers. We could also identify distinct stromal and immune  
90 components, corresponding to two different stromal subsets (Kwon et al., 2019), as well as  
91 immune cells (macrophages, T cells, B cells); some datasets also contained small populations of  
92 contaminating vas deferens and seminal vesicle cells.

93 To assess whether some of these epithelial populations might be lobe-specific, we next  
94 performed single-cell RNA-seq analyses of individual lobes (Figure 1B). We found that four of  
95 the luminal populations identified in the aggregated dataset were highly lobe-specific; hence, we  
96 named these populations LumA (AP-specific), LumD (DP-specific), LumL (LP-specific), and  
97 LumV (VP-specific). The remaining luminal population was observed in the datasets for all four  
98 lobes, and was highly enriched in the proximal portion of each lobe; thus, we termed this  
99 population LumP (proximal) (Figure 1C).

### 100 **Spatial localization and morphology of epithelial populations**

101 To examine the lobe-specificity and spatial distribution of these luminal populations, we  
102 identified candidate markers based on gene expression patterns in our single-cell datasets (Fig.  
103 1d). If suitable antibodies were available, we tested these candidate markers for their specificity  
104 by immunofluorescence staining of prostate sections (Figure 1D,E; Figure 1—figure supplement  
105 3). For example, we found that the LumA and LumD marker *Tgm4* was highly expressed by  
106 luminal cells in the distal region of the AP and DP, and that the LumL marker *Msemb* marked distal  
107 luminal cells in the LP. In contrast, the LumP marker *Ppp1r1b* was highly enriched in luminal  
108 cells that were primarily found in the proximal regions of all four lobes (Figure 1D,E). However,  
109 more general luminal markers such as androgen receptor (*Ar*) were expressed in all luminal  
110 populations (Figure 1—figure supplement 3).

111 Next, we investigated the spatial localization of these luminal populations along the  
112 proximal-distal axis in each lobe. We found that the LumP-containing proximal region extended  
113 from inside the rhabdosphincter to the first major ductal branch point in the AP, DP, and VP, but  
114 not the LP, whereas the bulk of the lobes corresponded to distal regions (Figure 1C). In the AP  
115 and DP, we found a discrete boundary in the medial region between the proximal LumP population  
116 and distal LumA or LumD populations, respectively (Figure 2A,C; Figure 2—figure supplement  
117 1A). In contrast, the LP had a population between the proximal and distal regions that expressed  
118 low levels of LumL markers (Figure 2A; Figure 2—figure supplement 1A). Histological analyses

119 revealed that distal luminal cells of each lobe had a tall columnar appearance consistent with  
120 secretory function, whereas proximal LumP cells typically had a cuboidal morphology. Notably,  
121 this analysis also revealed heterogeneity in the distal region of each lobe, with rare clusters of 1-  
122 10 LumP cells observed in the distal AP, DP, and LP, but larger LumP clusters in the distal VP  
123 (Figure 2B).

124 To clarify the phenotypic differences between proximal and distal luminal populations, we  
125 performed scanning electron microscopy of an 8-week old anterior lobe (Figure 2C; Figure 2—  
126 figure supplement 1B). LumA cells displayed dense regions of rough endoplasmic reticulum  
127 throughout the cytoplasm, many free ribosomes, and abundant secretory vesicles on the apical  
128 surface, typical of secretory cells. In contrast, LumP cells displayed areas of high mitochondrial  
129 density, complex membrane interdigitation, and no vesicles. At the proximal-distal boundary, we  
130 observed an abrupt transition between cellular morphologies that took place within 1-2 cell  
131 diameters. These ultrastructural differences indicate that the LumA and LumP populations  
132 represent distinct cell types, rather than cell states.

133 Next, we investigated the remaining epithelial population, which shares basal and luminal  
134 features in our single-cell RNA-seq analysis (Figure 1A). We found that this small population was  
135 enriched in the most proximal region of all four lobes, residing inside the rhabdosphincter and  
136 adjacent to the urethral junction (Figure 2D; Figure 1—figure supplement 1C); hence, we termed  
137 this novel population PrU (periurethral). Although this PrU population co-expresses some markers  
138 with LumP (Figure 1D), it also expresses several urothelial markers such as *Ly6d* and *Aqp3* (Figure  
139 2D).

140 The proximity of the PrU and LumP populations to the urethra and their co-expression of  
141 multiple markers led us to investigate their developmental origin. Consequently, we examined the  
142 expression of *Nkx3-1*, whose mRNA expression marks epithelial cells in ductal derivatives of the  
143 developing urogenital sinus, such as the prostate, but not the urothelium (Bhatia-Gaur et al., 1999);  
144 similarly, the *Nkx3-1<sup>Cre</sup>* driver also marks early prostate bud cells but not the urogenital sinus

145 during development (Thomsen et al., 2008; Zhang et al., 2008). In the adult prostate, *Nkx3-1* is  
146 expressed by all four distal luminal populations (LumA, LumD, LumL, LumV), but is not  
147 expressed by LumP (Figure 1—figure supplement 3). However, we found the *Nkx3-1<sup>Cre</sup>* driver  
148 lineage-marks most of the cells in all of these populations, including LumP and PrU, but not the  
149 urethra (Figure 2E). These data indicate that the LumP and PrU populations are derived from *Nkx3-*  
150 *1* expressing prostate epithelial cells, and are distinct from the urothelium.

### 151 **Functional analysis of epithelial populations**

152 We used an approach based on optimal transport theory (Wasserstein distance) to ascertain  
153 the relationships of these prostate epithelial populations (see *Methods*). The pair-wise comparisons  
154 (Figure 3A) can be captured by a neighbor-joining tree (Figure 3B), in which lower Wasserstein  
155 distance indicates greater similarity. We found that the distal populations grouped together, with  
156 the LumA and LumD populations being most closely related, followed by LumL and LumV. These  
157 distal populations were next most closely related to LumP, which in turn was most similar to PrU,  
158 followed by basal cells, suggesting a lineage relationship between LumP and distal luminal  
159 populations.

160 To investigate the functional properties of each epithelial population, we developed  
161 isolation strategies using microdissection and flow sorting (Figure 3C). We performed organoid  
162 formation assays with isolated cell populations using the defined ENR-based medium (Drost et  
163 al., 2016; Karthaus et al., 2014) as well as hepatocyte medium (HM), which has a more complex  
164 composition including serum (Chua et al., 2014). Despite differences in overall efficiency between  
165 media conditions, we consistently found that the PrU and basal populations were most efficient at  
166 forming organoids, followed by LumP, whereas the efficiency of distal LumA, LumD, LumL, and  
167 LumV was significantly lower (Figure 3D,E).

168 Next, we assessed the progenitor potential of isolated epithelial populations using *in vivo*  
169 tissue reconstitution assays. These assays involve recombination of dissociated epithelial cells with

170 rat embryonic urogenital mesenchyme followed by renal grafting, and have been extensively  
171 utilized for analysis of progenitor properties in the prostate (Lawson et al., 2007; Wang et al., 2013;  
172 Xin et al., 2003). We observed significant variation in the frequency of graft formation depending  
173 on the number and type of input epithelial cells (Figure 3F). Based on histological and  
174 immunostaining analyses, we found that each epithelial population typically gave rise to cells of  
175 the same type, but their ability to generate cells of other populations varied considerably (Figure  
176 3G; Figure 3—figure supplement 1A). Notably, grafts using distal luminal cells required relatively  
177 large numbers of input cells (approximately 30,000 cells) (Figure 3F), and were mostly composed  
178 of the same population (*i.e.*, LumA cells generated LumA cells) together with a normal or reduced  
179 percentage of basal cells; additionally, these grafts could contain small patches of cells expressing  
180 LumP markers on their periphery (Figure 3G; Figure 3—figure supplement 1A). Interestingly,  
181 LumV cells had the lowest grafting efficiency and generally formed small ductal structures that  
182 lacked basal cells. In contrast, LumP, PrU, and basal cells could produce grafts with significantly  
183 lower input cell numbers (approximately 1,000 cells), which contained LumP cells together with  
184 multiple distal luminal populations as well as a normal ratio of basal cells. We excluded  
185 contribution of host cells and rat urogenital epithelium to grafts using control tissue reconstitution  
186 assays with GFP-expressing donor epithelial cells (Figure 3—figure supplement 1B).

187 Taken together, these results suggest a spectrum of progenitor potential among the different  
188 epithelial populations. Both PrU and basal cells possessed high progenitor activity in these assays,  
189 with LumP cells also displaying enhanced activity. In contrast, the distal luminal populations are  
190 much less efficient in these assays. These findings are consistent with the inferred relationships  
191 between these populations based on molecular (Figure 3A,B) as well as histological and  
192 ultrastructural analyses (Figure 2A,C).

### 193 **Comparison of human and mouse prostate epithelial populations**

194 To examine the conservation of epithelial populations between the mouse and human  
195 prostate, we performed single-cell RNA-seq analyses of tissue samples from human



196 prostatectomies (Figure 4—source data). We identified two distinct luminal populations as well as  
197 a PrU-like population (Figure 4A-C), and examined their spatial distribution by immunostaining  
198 of benign human prostate tissue (Figure 4—source data). Using specific markers (KRT7,  
199 RARRES1), we found that one luminal population was primarily localized to ducts (Lum Ductal),  
200 whereas the second one, positive for MSMB and MME, was predominantly acinar (Lum Acinar),  
201 although some intermixing could be observed within ducts (Figure 4G). As in the mouse, the PrU-  
202 like population expressed both basal and luminal genes. Similarly, some PrU-like markers were  
203 shared with Lum Ductal, though these two populations are clearly distinguishable based on  
204 anatomical and histological features.

205         To extend this analysis, we computed the Wasserstein distances for each pair-wise  
206 comparison between epithelial and major non-epithelial populations identified (Figure 4D-F). This  
207 analysis showed that a PrU-like population was conserved between species. Furthermore, the  
208 human Lum Ductal cells are most closely related to mouse LumP, whereas the Lum Acinar cells  
209 are most closely related to LumL followed by LumV. Notably, these relationships were observed  
210 in each dataset.

211

## 212 **Discussion**

213 We have generated a comprehensive cellular atlas of the prostate epithelium and have  
214 defined spatial, morphological, and functional properties of each epithelial population. Our  
215 analyses have revealed spatial and functional heterogeneity primarily in the luminal epithelial  
216 compartment, including distinct cell populations along the proximal-distal axis as well as lobe-  
217 specific identities. Notably, we have shown marked differences in progenitor potential between  
218 cell identities, which likely correspond to distinct cell types rather than cell states (Morris, 2019).  
219 In tissue reconstitution assays, the ability of LumP and PrU cells to generate luminal distal and  
220 basal cells suggests that both populations have properties of multipotent progenitors. In contrast  
221 to the luminal compartment, basal cells appear relatively homogeneous, suggesting that previously  
222 reported basal heterogeneity (Goldstein et al., 2008; Lawson et al., 2007; Wang et al., 2020) may  
223 be more limited. Notably, the PrU population is not readily classified in either compartment as it  
224 is comprised of cells with both basal and luminal features.

225 Our findings also provide a broader context for other reports of epithelial heterogeneity.  
226 Recent single-cell RNA-seq analysis of the mouse anterior prostate identified three distinct luminal  
227 populations (Karthaus et al., 2020), where L1 appears to correspond to our LumA and L2 to LumP;  
228 we also identified a population expressing L3 genes in both mouse and human datasets, but have  
229 annotated this as ductus/vas deferens based on marker expression (Figures 1A, 4C), relying on  
230 previous findings (Blomqvist et al., 2006). Based on patterns of gene expression, we suggest that  
231 the LumP population corresponds to  $Sca1^{\text{high}}$  luminal cells (Kwon et al., 2016) as well as Trop2  
232 (Tacstd2) positive cells (Crowell et al., 2019), which have been described as proximal progenitor  
233 populations with scattered distal cells, and may also be responsible for the enhanced serial grafting  
234 efficiency of proximal prostate (Goto et al., 2006). In the human prostate, the progenitor activity  
235 of LumP and/or PrU-like cells may have been observed by retrospective lineage tracing using  
236 mitochondrial mutations (Moad et al., 2017). In addition, the LumP and PrU populations may  
237 share some similarities with the “hillock” and “club” cells originally described in a cellular atlas

238 of the mouse lung (Montoro et al., 2018) and subsequently reported in the human prostate (Joseph  
239 et al., 2020), but the precise relationship of these populations is unclear.

240         Since LumP and PrU cells display multipotent progenitor activity in both organoid  
241 formation and tissue reconstitution assays, their spatial distribution may reflect the ability of the  
242 prostate to repair itself from a proximal to distal direction in response to extensive tissue damage  
243 as well as from distal progenitors in response to more localized injury. Our findings suggest that  
244 the novel PrU population in particular may play a role in prostate tissue repair and/or regeneration,  
245 consistent with the previous identification of Ly6d-positive cells as a castration-resistant  
246 progenitor (Barros-Silva et al., 2018). Notably, the ability of *Nkx3-1<sup>Cre</sup>* to lineage-mark both PrU  
247 and LumP, but not the urethra, suggests that these cell populations are distinct from the urothelium,  
248 despite the molecular similarities between the proximal prostate and the urethra noted in a recent  
249 report (Joseph et al., 2020). Nonetheless, our results imply that lineage relationships among the  
250 tissues derived from the urogenital sinus (Georgas et al., 2015) require careful elucidation, since  
251 they are of fundamental importance for understanding the genesis of congenital defects in the  
252 urogenital system.

253         Our findings help resolve a long-standing question about the relationship of the mouse and  
254 human prostates. Specifically, we speculate that mouse proximal and distal regions are most  
255 related to human ductal and acinar regions, respectively, and that the mouse LP is most similar to  
256 the human peripheral zone. Few if any studies have specifically assessed tumor phenotypes in the  
257 LP, as it is small and usually combined with the DP as the dorsolateral prostate (DLP); however,  
258 our analyses show that the DP differs significantly from the LP at the anatomical and molecular  
259 levels. Consequently, we suggest that a re-evaluation of tumor phenotypes in genetically-  
260 engineered mouse models may reveal a closer similarity to human prostate tumor histopathology  
261 than previously appreciated.

262         Finally, the elucidation of prostate epithelial heterogeneity has potentially significant  
263 implications for understanding the cell of origin for prostate adenocarcinoma. Previous studies

264 have suggested that luminal cells as well as basal cells can serve as the cell of origin for prostate  
265 cancer (Wang et al., 2013; Wang et al., 2014; Xin, 2019), yet known differences in human prostate  
266 cancer outcome (*e.g.*, (Zhao et al., 2017)) cannot be simply explained on this basis. Therefore,  
267 further analyses of epithelial heterogeneity and progenitor potential will likely lead to key insights  
268 into prostate tumor initiation and progression.  
269

## 270 Key Resources Table

| Reagent type (species) or resource                               | Designation                        | Source or reference             | Identifiers                                        | Additional information              |
|------------------------------------------------------------------|------------------------------------|---------------------------------|----------------------------------------------------|-------------------------------------|
| Strain, strain background ( <i>Mus musculus</i> )                | C57BL6/N (wild type)               | Taconic                         | C57BL6/Ntac                                        | 8-10 week old males                 |
| Strain, strain background ( <i>Mus musculus</i> )                | SW (wild type)                     | Taconic                         | Tac:SW                                             | 8-10 week old males                 |
| Strain, strain background ( <i>Mus musculus</i> )                | UbC-GFP                            | Jackson Laboratory, JAX #004353 | C57BL/6-Tg(UBC-GFP)30Scha/J                        | BL6 background, 8-13 week old males |
| Strain, strain background ( <i>Mus musculus</i> )                | R26r-YFP                           | Jackson Laboratory, JAX #007903 | B6.Cg-Gt(ROSA)26Sor <sup>tm3(CAG-EYFP)</sup> Hze/J | 8-13 week old males                 |
| Strain, strain background ( <i>Mus musculus</i> )                | Nkx3-1Cre                          | Shen lab                        | Generated in our lab                               | BL6 background, 8-13 week old males |
| Strain, strain background ( <i>Mus musculus</i> )                | R2G2                               | Envigo                          | B6;129-Rag2 <sup>tm1Fwall</sup> 2rgtm1Rsky/DwIHsd  | 8-15 week old males                 |
| Strain, strain background ( <i>Mus musculus</i> )                | NOD/SCID                           | Jackson Laboratory, JAX #001303 | NOD.Cg-Prkdc <sup>scid</sup> /J                    | 8-15 week old males                 |
| Strain, strain background ( <i>Rattus norvegicus domestica</i> ) | Sprague-Dawley embryos             | Charles River #400              | SAS Sprague Dawley                                 | E18 embryos from pregnant females   |
| Antibody                                                         | anti-mouse Cd66a (CEACAM1)-PE      | Miltenyi                        | cat 130-106-209, lot 5190208411                    | (FACS 1:100uL)                      |
| Antibody                                                         | anti-mouse Tacstd2 (Trop2)-APC     | R&D                             | cat FAB1122A, lot AAZB0117091                      | (FACS 1:100uL)                      |
| Antibody                                                         | anti-mouse Ly-6a/e Sca-1 PE-Vio770 | Miltenyi                        | cat 130-106-258, lots 5190308494 & 5180615495      | (FACS 1:100uL)                      |
| Antibody                                                         | anti-mouse Cd31 (Lin)-FITC         | eBiosciences                    | cat 11-0311-82, lot 1978184, clone 390             | (FACS 1:100uL)                      |
| Antibody                                                         | anti-mouse Cd45 (Lin)-FITC         | eBiosciences                    | cat 11-0451-82, lot 2015744, clone 30-F11          | (FACS 1:100uL)                      |

|          |                                      |                |                                                 |                         |
|----------|--------------------------------------|----------------|-------------------------------------------------|-------------------------|
| Antibody | anti-mouse Ter119 (Lin)-FITC         | eBiosciences   | cat 11-5921-82, lot 2009756, clone TER-119      | (FACS 1:100uL)          |
| Antibody | anti-mouse Ly6d -APC-Vio770          | Miltenyi       | cat 130-115-315, lot 5190715088, clone REA A906 | (FACS 1:100uL)          |
| Antibody | mouse anti-mouse DARPP-32 (Ppp1r1b)  | SCBT           | cat sc-271111, lot C2719, clone H-3             | (IF 1:50uL)             |
| Antibody | rabbit anti-mouse DARPP-32 (Ppp1r1b) | Invitrogen     | cat MA5-14968, lot VB2947074                    | (IF 1:400uL)            |
| Antibody | rabbit anti-mouse Trpv6              | alomone labs   | cat ACC-036, lot ACC036AN1002                   | (IF 1:100uL)            |
| Antibody | rabbit anti-mouse Lrrc26             | alomone labs   | cat APC-070, lot APC070AN0102                   | (IF 1:100uL)            |
| Antibody | rabbit anti-mouse Msmb               | Abclonal       | cat A10092, lot 204440101                       | (IF 1:100uL)            |
| Antibody | rabbit anti-mouse Cldn10             | Invitrogen     | cat 38-8400, lot UA279882                       | (IF 1:100uL)            |
| Antibody | rabbit anti-mouse Mgl1               | Invitrogen     | cat PA5-27915, lots TI2636340A & VB2935243A     | (IF 1:250uL)            |
| Antibody | rabbit anti-mouse Tgm4               | Invitrogen     | cat PA5-42106, lot uc2737144                    | (IF 1:100uL)            |
| Antibody | rabbit anti-mouse Gsdma              | abcam          | cat ab230768, lot GR3212791-1                   | (IF 1:100uL)            |
| Antibody | rabbit anti-mouse Krt7               | abcam          | cat ab68459, lot GR40294-6                      | (IF 1:250-500uL)        |
| Antibody | rabbit anti-mouse Aqp3               | Biorbyt        | cat orb47955, lot B3440                         | (IF 1:500uL)            |
| Antibody | chicken anti-mouse Krt5              | Biolegend      | cat 905901, lot B271562                         | (IF 1:500uL)            |
| Antibody | rabbit anti-mouse p63                | Biolegend      | cat 619002, lot B262186                         | (IF 1:250uL)            |
| Antibody | rat anti-mouse Krt8/18               | DSHB           | Troma-I NA                                      | (1:250uL, lot specific) |
| Antibody | mouse anti-mouse Synaptophysin       | BD Biosciences | cat BD611880, lot 8290534 2                     | (IF 1:500uL)            |

|                            |                                          |                                                                                                                                 |                               |                                                                                                                 |
|----------------------------|------------------------------------------|---------------------------------------------------------------------------------------------------------------------------------|-------------------------------|-----------------------------------------------------------------------------------------------------------------|
| Antibody                   | rabbit anti-mouse Chromogranin A         | abcam                                                                                                                           | cat ab15160, lot GR3205971-2  | (IF 1:500uL)                                                                                                    |
| Antibody                   | chicken anti-GFP                         | abcam                                                                                                                           | cat ab13970, lot GR3190550-30 | (IF 1:1000uL)                                                                                                   |
| Antibody                   | rabbit anti-mouse Nkx3.1                 | Athena Enzymes                                                                                                                  | cat "0315" 20316              | (IF 1:100uL)                                                                                                    |
| Antibody                   | rabbit anti-mouse ki67                   | abcam                                                                                                                           | cat ab15580, lot GR3198158    | (IF 1:100uL)                                                                                                    |
| Antibody                   | mouse anti-mouse Krt4                    | Invitrogen                                                                                                                      | cat MA1-35558, lot TB2524522  | (IF 1:100uL)                                                                                                    |
| Antibody                   | rabbit anti-mouse Clusterin              | LS-Bio                                                                                                                          | cat LS-331486, lot 115142     | (IF 1:100uL)                                                                                                    |
| Antibody                   | rabbit anti-mouse Wfdc2                  | Invitrogen                                                                                                                      | cat PA5-80226, lot TK2671201  | (IF 1:100uL)                                                                                                    |
| Antibody                   | rabbit anti-mouse AR (Androgen receptor) | abcam                                                                                                                           | cat ab133273, lot GR3271456-1 | (IF 1:100uL)                                                                                                    |
| Antibody                   | mouse anti-human Krt7                    | Thermo Fisher                                                                                                                   | cat MA1-06316, lot OVTL12/30  | (IF 1:200uL)                                                                                                    |
| Antibody                   | mouse anti-human Rarres1                 | Thermo Fisher                                                                                                                   | cat MA5-26247, lot OTI1D2     | (IF 1:200uL)                                                                                                    |
| Antibody                   | mouse anti-human Mme (Cd10)              | SCBT                                                                                                                            | cat sc-46656, clone F-4       | (IF 1:100uL)                                                                                                    |
| Antibody                   | rabbit anti-human Msmb                   | Abclonal                                                                                                                        | cat A10092                    | (IF 1:200uL)                                                                                                    |
| Software, algorithm (code) | Random Matrix Theory                     | R. Rabadan Lab                                                                                                                  |                               | <a href="https://rabadan.c2b2.columbia.edu/html/randomly/">https://rabadan.c2b2.columbia.edu/html/randomly/</a> |
| Software, algorithm (code) | Python Optimal Transport                 | Rémi Flamary and Nicolas Courty, POT Python Optimal Transport library                                                           |                               | <a href="https://github.com/rflamary/POT">https://github.com/rflamary/POT</a>                                   |
| Software, algorithm (code) | Phylogenetic tree analysis               | Phangorn package                                                                                                                |                               | <a href="https://github.com/KlausVigo/phangorn">https://github.com/KlausVigo/phangorn</a>                       |
| Software, algorithm (code) | Leiden algorithm                         | F. A. Wolf, P. Angerer, and F. J. Theis, Genome Biology (2018). "SCANPY: large-scale single-cell gene expression data analysis" |                               | <a href="https://scanpy.readthedocs.io/en/stable">https://scanpy.readthedocs.io/en/stable</a>                   |

## 272 **Materials and Methods**

### 273 **Mouse strains and genotyping**

274 Wild type C57BL6/N (C57BL6/NTac, 8-10 weeks old) and Swiss-Webster (8-10 weeks)  
275 mice were purchased from Taconic. The *Ubc-GFP* (C57BL/6-Tg(UBC-GFP)30Scha/J, 8-13  
276 weeks old; JAX #004353)(Schaefer et al., 2001) and *R26R-YFP* (B6.Cg-  
277 *Gt(ROSA)26Sor<sup>tm3(CAG-EYFP)Hze</sup>/J*; JAX #007903) (Madisen et al., 2010) mice were obtained from  
278 the Jackson Laboratory. The *Nkx3-1<sup>Cre</sup>* allele has been previously described (Lin et al., 2007;  
279 Thomsen et al., 2008). As hosts for renal grafts, R2G2 mice (B6;129-  
280 *Rag2<sup>tm1Fwa</sup>Il2rg<sup>tm1Rsky</sup>/DwIHsd*, 8-15 weeks old) were purchased from Envigo, and NOD/SCID  
281 mice (NOD.Cg-*Prkdc<sup>scid</sup>/J*, 8-14 weeks old; JAX #001303) were purchased from the Jackson  
282 Laboratory. To obtain urogenital mesenchyme for tissue recombination and renal grafting, we used  
283 E18 Sprague-Dawley rat embryos from timed matings (Charles River #400). Animal studies were  
284 approved by and conducted according to standards set by the Columbia University Irving Medical  
285 Center (CUIMC) Institutional Animal Care and Use Committee (IACUC).

### 286 **Isolation of mouse prostate tissue**

287 The anterior (AP), dorsal (DP), lateral (LP), and ventral prostate (VP) lobes were dissected  
288 individually, using a transverse cut at the intersection of each lobe with the urethra to include the  
289 periurethral (PrU) region. For some analyses, we dissected PrU tissues in the most proximal  
290 regions (extending 0.5-2 mm from the connection of the lobes with the urethra), or the remainder  
291 of the proximal regions separately from the distal lobes. Paired lobes were collected from a single  
292 C57BL/6 mouse for each scRNA-seq experiment, or from 2-5 C57BL/6 mice for flow sorting,  
293 organoid culture, or tissue reconstitution experiments. For analyses of prostate anatomy, lobes  
294 were either dissected individually or a deep cut was made at the caudal end of the urethra for  
295 removal of entire urogenital apparatus.



## 296 **Acquisition and pathological assessment of human prostate tissue samples**

297 Human prostate tissue specimens were obtained from patients undergoing  
298 cystoprostatectomy for bladder cancer or radical prostatectomy at Columbia University Irving  
299 Medical Center or at Weill Cornell Medicine. Patients were aged 54-79 years old and gave  
300 informed consent under Institutional Review Board-approved protocols. The clinical  
301 characteristics of these patients are provided in Figure 4—source data. Following surgery, prostate  
302 tissue was submitted for gross pathological annotation and sectioning, with ischemic time less than  
303 one hour.

304 To acquire samples for single-cell RNA-sequencing, the prostate was transversely  
305 sectioned perpendicular to the urethra in three main parts (apex, mid and base), which were further  
306 divided based on laterality (left or right). Each part was cut in thick sections that included all three  
307 prostatic zones (peripheral, transversal and central). Thick sections with low or no tumor burden  
308 were selected for the study based on clinical findings and/or biopsies, and divided in three plates  
309 by performing two parallel cuts. The upper flanking plate was flash-frozen, cryosectioned, and a  
310 rapid review was performed by a board-certified surgical pathologist (H.H.) to provide preliminary  
311 assessment on the presence of benign prostate tissue/absence of carcinoma. The middle flanking  
312 plate was stored in RPMI medium with 5% FBS on ice, and immediately transferred to the research  
313 facility for single-cell RNA sequencing. The lower flanking plate was processed by formalin  
314 fixation and paraffin embedding, followed by sectioning and histological review to confirm  
315 presence of benign prostate tissue/absence of carcinoma.

316 For immunostaining analysis of prostate tissue sections, blocks previously assessed as  
317 containing benign prostate histology were selected by a surgical pathologist (B.D.R.). Paraffin  
318 sections were immunostained for markers of interest as well as CK5 to confirm the presence of  
319 basal cells, and adjacent sections were stained by H&E. H&E sections were then reviewed to  
320 confirm benign pathology.

## 321 **Dissociation of mouse and human prostate tissue**

322 Prostate tissues were minced with scissors and then incubated in papain (20 units/ml) with  
323 0.1 mg/ml DNase I (Worthington LK003150) at 37°C with gentle agitation. After 45 minutes,  
324 samples were gently triturated, then incubated for another 20-45 minutes in papain as needed.  
325 Samples were gently triturated again, followed by quenching of the enzyme using 1 mg/ml  
326 ovomucoid/bovine serum albumin solution with 0.1 mg/ml DNase I (Worthington LK003150).  
327 Cells were passed through a 70 µm strainer (PluriSelect 43-10070-70) and washed with PBS-  
328 EDTA with 0.1 mg/ml DNase I (Corning MT-46034CI). If needed, the samples were additionally  
329 digested in TrypLE Express (Invitrogen 12605-036) for 3-5 minutes at 37°C with gentle agitation.  
330 The samples were gently triturated and the TrypLE was inactivated by addition of HBSS with 10%  
331 FBS and 0.1 mg/ml DNase I. Samples were passed through a 40 µm strainer (PluriSelect 43-10040-  
332 70), washed in 1x PBS, and resuspended in appropriate buffers for downstream analyses.

## 333 **Single-cell RNA-sequencing**

334 Dissociated cells were washed twice in 1x PBS, passed twice through 20 µm strainers  
335 (Pluriselect 43-10020-70), and counted using the Countess™ II FL Automated Cell Counter  
336 (ThermoFisher). If the viability of samples was >80% and the single-cell fraction was >95%, the  
337 cells were resuspended in 1x PBS with 0.04% BSA at approximately  $1 \times 10^6$  cells/ml. Samples  
338 were submitted to the Columbia JP Sulzberger Genome Center for single-cell RNA-sequencing on  
339 the 10x Genomics Chromium platform. Libraries were generated using the Chromium Single Cell  
340 3' Reagent Kit v2, with 12 cycles for cDNA amplification and 12 cycles for library construction.  
341 Samples were sequenced on a NovaSeq 6000 ( $r1 = 26$ ,  $i1 = 8$ ,  $r2 = 91$ ). Sequencing data were  
342 aligned and quantified using the Cell Ranger Single-Cell Software Suite (v.2.1.1) using either the  
343 GRCm38 mouse or the GRCh38 human reference genomes.

344 For the mouse prostate, two independent biological replicate samples of whole prostate  
345 were submitted for scRNA-seq, with 2,361 and 2,927 cells sequenced. Two separate biological

346 replicates for individual lobes were also used for scRNA-seq, with 1,581-2,735 cells sequenced  
347 for sample. For human prostate (Figure 4—source data), three independent samples (#1-3) that  
348 corresponded to regions of benign histology were submitted for scRNA-seq, with 1,600, 2,303,  
349 and 2,825 cells sequenced, respectively. Single-cell datasets have been deposited in GEO under  
350 accession number GSE150692.

### 351 **Flow cytometry**

352 Dissociated cell suspensions were counted and resuspended in FACS buffer (1-3% fetal  
353 bovine serum in 1x PBS or HBSS, 1 mM EDTA, and 0.1 mg/ml DNase I). Pre-incubation was  
354 performed with Fc receptor blocking antibodies for some experiments. Primary antibodies were  
355 added at a final concentration of 1:100 and incubated at 4°C for 20-30 minutes. Samples were  
356 incubated with 1  $\mu$ M propidium iodide for 15 minutes before sorting for dead cell exclusion. Cells  
357 were sorted using a BD Influx, using the widest nozzles and lowest pressure settings (140  $\mu$ m  
358 nozzle and 7 psi for the Influx), and collected in low-binding tubes (Eppendorf 0030-108-116).  
359 Data analysis was conducted using FCS Express 7 software. A slightly modified strategy was used  
360 to sort prostate cells from *Ubc-GFP* mice.

### 361 **Organoid culture**

362 For ENR conditions (Karthaus et al., 2014), sorted cells from *Ubc-GFP* mice were  
363 resuspended at a final concentration of 1,000 cells per 30  $\mu$ l droplet of Matrigel (Corning 354234),  
364 and placed in individual wells of a 24-well plate. The Matrigel was covered with 500  $\mu$ l of ENR  
365 medium, supplemented with 10 nM dihydrotestosterone (DHT) and 10  $\mu$ M Y-27632. Media were  
366 replenished at day 5 and organoids were imaged at day 10. Organoid measurements were  
367 performed using the Fiji Particle Analysis Plugin (Rueden et al., 2017; Schindelin et al., 2012),  
368 excluding particles with area < 2,000  $\mu$ m<sup>2</sup> and roundness value < 0.5. If needed, Watershed was

369 applied to separate overlapping organoids/particles, with wells from at least 4 independent  
370 experiments analyzed.

371 For hepatocyte media (HM) conditions (Chua et al., 2014), sorted cells from wild-type  
372 C57BL/6 mice were plated at 2,000 and 5,000 cells per well in 5% Matrigel, 10 nM DHT, and 10  
373  $\mu$ M Y-27632 using ultra-low attachment 96-well plates (Corning 3474) and grown in hepatocyte  
374 media with 5% Matrigel, with media replenished every 5 days. Organoid formation efficiencies  
375 were calculated on day 12-13 of culture. Since LumV cells tended to form small structures  
376 containing 1-4 cells, we used a required minimum cut-off size; organoid images were analyzed  
377 using ImageJ. Data were collected from 3 biological replicate experiments, with a minimum of 2-  
378 3 technical replicates for each population in each experiment.

### 379 **Renal grafting**

380 For tissue reconstitution experiments, urogenital mesenchyme (UGM) cells were collected  
381 from embryonic day 18.5 rat embryos as described (Chua et al., 2018) and passed through a 100  
382  $\mu$ M filter (Pluriselect) before use. Sorted mouse epithelial cells were used at ranges from 250 to  
383 60,000 cells depending on the specific population; since basal cells have been previously examined  
384 in graft experiments (*e.g.*, (Wang et al., 2013)), we did not investigate the minimum number of  
385 basal cells required for graft growth in these experiments. Rat UGM cells and sorted mouse  
386 epithelial cells were combined at pre-determined ratios (*e.g.*, 250,000 UGM:5,000 LumP cells)  
387 and resuspended in 10-15  $\mu$ l buttons composed of 9:1 collagen 1 (Corning 354249):setting solution  
388 (10x EBSS, 0.2 M NaHCO<sub>3</sub>, and 50 mM NaOH). After solidification of the collagen, the buttons  
389 were incubated in DMEM media with 10% FBS and 10 nM DHT overnight, followed by grafting  
390 under the kidney capsule of host immunodeficient mice on the next day. At the time of surgery, a  
391 slow-release testosterone pellet (12.5 mg testosterone, 90 day release; Innovative Research of  
392 America NA-151) was inserted subcutaneously in each host mouse. Grafts were analyzed 8-12  
393 weeks after surgery.

## 394 **Histology, immunostaining, and image analysis**

395 For generation of paraffin blocks, prostate tissues were dissected in ice-cold HBSS and  
396 fixed in 10% formalin overnight, followed by processing through an ethanol gradient and  
397 embedding. For generation of frozen blocks, dissected tissues were fixed in 4% paraformaldehyde,  
398 immersed in sucrose overnight (30% in 1x PBS), embedded in OCT (Tissue-Tek 25608-930), and  
399 stored at -80°C. Alternatively, samples were flash-frozen in 2-methyl-butane (Sigma-Aldrich  
400 M32631) at -150°C for 1 hour, then stored at -80°C. Paraffin-embedded tissues were sectioned  
401 using a MICROM HM 325 microtome, and cryo-preserved tissues were sectioned using a Leica  
402 CM 1900 cryostat, at thicknesses of 5-13  $\mu\text{m}$ .

403 For histological analyses, hematoxylin-eosin (H&E) staining was performed on paraffin  
404 sections using standard procedures. For immunofluorescence staining of paraffin sections, antigen  
405 retrieval was performed by boiling slides in citrate-based or Tris-based antigen unmasking buffer  
406 (Vector Labs H3300 and H3301) for 45 minutes. For immunofluorescence of cryosections, slides  
407 were rapidly fixed in either 4% paraformaldehyde or 10% NBF for 5 minutes after sectioning.  
408 Slides were washed, blocked in 5% animal serum for 1 hour, and incubated with primary  
409 antibodies overnight at 4°C. Slides were washed and incubated with Alexa Fluor secondary  
410 antibodies (Life Technologies) for one hour. Sections were stained with DAPI, and mounted  
411 (Vector Labs H-1200). Fluorescent images were acquired using a Leica TCS SP2, a Leica TCS  
412 SP5, or a Nikon Ti Eclipse inverted confocal microscope.

## 413 **Electron microscopy**

414 Prostate tissue from a C57BL/6 mouse at 8 weeks of age was dissected and fixed for 2  
415 hours in 0.1 M sodium cacodylate buffer (pH 7.2) containing 2.5% glutaraldehyde and 2%  
416 paraformaldehyde. A portion of the AP lobe at the proximal-distal boundary was micro-dissected  
417 and post-fixed for two hours with 1% osmium tetroxide, contrasted with 1% aqueous uranyl  
418 acetate, dehydrated using an ethanol gradient and embedded in EMBED 812 (Electron Microscopy

419 Sciences, Hatfield, PA). 70 nm ultrathin sections were cut, mounted on formvar coated slot copper  
420 grids, and stained with uranyl acetate and lead citrate. Stained grids were imaged with a Zeiss  
421 Gemini300 scanning electron microscope using the STEM detector.

## 422 **Statistical analysis**

423 Prism v.8 was used for statistical analyses of functional data and for plot generation. For  
424 analyses of organoid formation efficiencies, the data passed the Shapiro-Wilk test for normal  
425 distribution ( $p > \alpha = 0.05$ ), but did not pass the Bartlett's test for equal variance ( $p < 0.05$ ). We  
426 therefore used the Brown-Forsythe and Welch One-way Analysis of Variance (ANOVA) to  
427 confirm statistically significant differences between organoid populations ( $p < 0.0001$  for both HM  
428 and ENR conditions). Since all populations have fewer than 50 data points per sample, we used  
429 the Dunnett's T3 multiple comparisons test to determine which populations significantly differ  
430 ( $p < 0.05$ ). The p-values on the graphs indicate the least significant difference observed between  
431 compared populations.

432 For analyses of graft efficiency, the data did not pass the Shapiro-Wilk test for normal  
433 distribution ( $p < \alpha = 0.05$ ), or Bartlett's test for equal variance ( $p < 0.05$ ). We therefore used a non-  
434 parametric Kruskal-Wallis test to confirm statistically significant differences between graft input  
435 cell numbers by epithelial population ( $p < 0.0001$ ), followed by the two-stage linear step-up  
436 procedure of Benjamini, Krieger and Yekutieli ( $p < 0.05$ ). The p-value on the graph indicates the  
437 average significant difference between the up to 10 lowest input cell numbers for each distal  
438 luminal population compared to the LumP population.

## 439 **Bioinformatic analysis of single-cell RNA-seq data**

### 440 *Filtering the expression matrix*

441 The starting pool of cells in the mouse prostate analysis is 13,429 cells, which is composed  
442 of two whole prostate samples of 2,361 and 2,927 cells, and 4 samples corresponding to each of

443 the lobes at 2,735 (AP), 1,781 (DP), 2,044 (LP), and 1,581 (VP) cells. The starting pool of cells  
444 for human prostate analyses is 6,728 cells coming from three independent samples of 2,303, 1,600  
445 and 2,825 cells each. When filtering the data, we removed cells with less than 500 genes detected  
446 and cells with >10% of total transcripts derived from mitochondrial-encoded genes. The  
447 expression matrices are normalized by  $\log_2(1 + TPM)$ , where  $TPM$  denotes transcripts per  
448 million.

#### 449 *Batch effect correction*

450 For Figure 1A, we have aggregated the two samples corresponding to the whole mouse  
451 prostate. As a first step to remove the batch effect we have used the algorithm described in (Stuart  
452 et al., 2019), using default parameters.

#### 453 *Random Matrix Theory application to single-cell transcriptomics*

454 Random Matrix Theory (RMT) is a field with many applications in different branches of  
455 mathematics and physics. The mathematical foundations of RMT were developed by the  
456 theoretical physicist Dyson in the 1960's when he described heavy atomic nuclei energy levels.  
457 One of the deepest properties of RMT is universality, *i.e.*, the insensitivity of certain statistical  
458 properties to variations of the probability distribution used to generate the random matrix. This  
459 property provides a unified and universal way to analyze single-cell data, where the gene and cell  
460 expression distributions are different for each cell. By using RMT universality, one can address  
461 the specific sparsity and noise of each single-cell dataset.

462 In this work we have used *Randomly*, an RMT-based algorithm (Aparicio et al., 2020). The  
463 idea of this algorithm is based on the fact that a single-cell dataset shows a threefold structure: a  
464 random matrix, a sparsity-induced (fake) signal and a biological signal. Indeed, 95% or more of  
465 the single-cell expression matrix is compatible with being a random matrix and hence, in such a  
466 case, with being pure noise (Aparicio et al., 2020). In order to detect the part of the expression  
467 matrix compatible with noise, *Randomly* uses the universality properties of RMT. More

468 specifically, let us suppose a  $N \times P$  expression matrix  $X$ , where  $N$  is the number of cells and  $P$  is  
469 the number of genes, and where each column is independently drawn from a distribution with  
470 mean zero and variance  $\sigma$ , the corresponding Wishart matrix is defined as an  $N \times N$  matrix:

$$471 \quad W = \frac{1}{P} XX^T$$

472 The eigenvalues  $\lambda_i$  and normalized eigenvectors  $\psi_i$  of the Wishart matrix where  $i = 1, 2, \dots, N$  are  
473 given by the following relation:

$$474 \quad W\psi_i = \lambda_i\psi_i$$

475 If  $X$  happens to be a random matrix (a matrix whose entries  $x_{ij}$  are randomly sampled from a given  
476 distribution), then  $W$  becomes a random covariance matrix and the properties of its eigenvalues  
477 and eigenvectors are described by Random Matrix Theory. Universality properties of RMT arise  
478 in the limit  $N \rightarrow \infty$ ,  $P \rightarrow \infty$ ,  $\gamma = \frac{N}{P}$  fixed. One of the consequences of universality at the level of  
479 eigenvalues  $\lambda_i$ , is that empirical density of states converges to the so-called Marchenko-Pastur  
480 (MP) distribution:

$$481 \quad \rho_{MP}(\lambda) = \frac{1}{2\pi\gamma\sigma^2} \frac{\sqrt{(a_+ - \lambda)(\lambda - a_-)}}{\lambda} \mathbb{I}_{[a_-, a_+]}$$

482 where

$$483 \quad a_{\pm} = \sigma^2(1 \pm \sqrt{\gamma})^2$$

484 and  $\sigma$  represents the variance of the probability distribution that generates each element in the  
485 random matrix ensemble. Any deviation of the eigenvalues from MP distribution would imply that  
486 the expression matrix  $X$  is not completely random, and therefore contains a signal that could be  
487 further analyzed.

488 One of the main novelties of the *Randomly* algorithm is the study of eigenvectors. At the  
489 level of eigenvectors, RMT universality is manifested through the so-called eigenvector  
490 delocalization, which implies that the norm of the eigenvectors  $\psi_i$  is equally distributed among all  
491 their components  $\alpha$ :



492 
$$|\psi_i^{(\alpha)}| \sim \frac{1}{\sqrt{N}}$$

493 Interestingly, the distribution of components for delocalized eigenvectors at large  $N$  approximates  
494 a Gaussian distribution with mean zero and  $1/N$  variance

495 
$$f(\psi) \sim \frac{N}{\sqrt{2\pi}} e^{\left(\frac{-N\psi^2}{2}\right)}$$

496 The presence of any localized (non-delocalized) eigenvector implies that expression matrix  $X$  is  
497 not completely random, and hence the existence of a signal that carries information. However, in  
498 single-cell datasets, there is a very important subtlety due to the sparsity, which can generate a  
499 fake signal (Aparicio et al., 2020). At the single-cell analysis level, the presence of localized  
500 eigenvectors related with sparsity implies the existence of an undesired (fake) signal. The  
501 *Randomly* algorithm is able to eliminate the sparsity-induced (fake) signal and isolate the  
502 biological signal.

503 In Figure 1—figure supplement 2, we show one example of the performance of the  
504 *Randomly* algorithm performance. Figure 1—figure supplement 2E shows a comparison of the  
505 eigenvector localization with and without sparsity-induced signal in one of the single-cell mouse  
506 datasets. The number of eigenvectors that carries signal is larger for the case with sparsity-induced  
507 signal. After removal of the fake signal due to sparsity, Figure 1—figure supplement 2F shows the  
508 distribution of eigenvalues and the fraction behaving in agreement with the MP distribution. More  
509 than 95% of the expression matrix is compatible with a random matrix and therefore is equivalent  
510 to random noise. In Figure 1—figure supplement 2G and 2H, the algorithm projects the original  
511 expression matrix into the signal-like eigenvectors and the noise-like eigenvectors and performs a  
512 chi-squared test for the variance (normalized sample variance), which allows identification of the  
513 signal-like genes based on a false discovery rate.

514 The algorithm *Randomly* is a public Python package and can be found in  
515 <https://rabadan.c2b2.columbia.edu/html/randomly/>.

## 516 *Clustering*

517 Clustering has been performed using the Leiden algorithm as is implemented in (Wolf et  
518 al., 2018). The selection of the number of clusters is based on the mean silhouette score. More  
519 specifically, we performed a set of clustering performances for different Leiden resolution  
520 parameters and compute the mean silhouette score for each case. The silhouette coefficient for a  
521 specific cell is given by:

$$522 \quad s = \frac{b - a}{\max(a, b)}$$

523 where the  $a$  is the mean distance between a cell and all the other cells of the same class, and  
524 parameter  $b$  is the mean distance between a cell and all other cells in the next nearest cluster.  
525 Figure 1—figure supplement 2I shows the mean silhouette score as a function of the Leiden  
526 resolution parameter and the number of clusters for each case. The strategy we follow is selecting  
527 the number of clusters that maximizes this correlation. In some cases, it could be also useful to  
528 sub-cluster some of the clusters, repeating the strategy just described for one specific cluster. The  
529 sub-clustering has been used to disentangle immune populations or the vas deferens and the  
530 seminal vesicle populations.

## 531 *t-SNE representations and gene visualizations*

532 In order to visualize single-cell clusters, we performed a further dimensional reduction to  
533 two dimensions using t-distributed Stochastic Neighbor Embedding (t-SNE) representation. We  
534 used the default parameters, which are: Learning rate = 1000, Perplexity = 30 and Early  
535 exaggeration = 12. The tSNE, dot-plots, and ridge-plots were generated using the visualization  
536 functions of the *Randomly* package (Aparicio et al., 2020).

## 537 *Comparison of RMT with traditional pipelines based on PCA dimensional reduction*

538 To show a comparison with traditional approaches based on PCA, we have followed the  
539 pipeline in a public tool (Wolf et al., 2018) often used for single-cell analysis. We have performed

540 a PCA reduction, selecting principal components (PCs) through accumulated variance changes  
541 across the different PCs (Figure 1—figure supplement 2A). In this case, only 10 PCs are selected  
542 following this approach. After the dimensional reduction, we performed a clustering following the  
543 strategy described in the previous section (Figure 1—figure supplement 2B), selecting the number  
544 of clusters that maximize the mean silhouette score. Comparing Figure 1—figure supplement 2B  
545 and 2I, it is clear that the RMT generates a better clustering performance: the maximum of the  
546 silhouette score curve is larger than that generated by the traditional PCA approach, and one of  
547 these clusters is able to capture the periurethral (PrU) population (Figure 1—figure supplement  
548 2J). On the other hand, the method based on traditional PCA is not able to capture the PrU  
549 population even if we allow for larger Leiden resolutions (Figure 1—figure supplement 2C and  
550 2D).

### 551 *Differential expression analysis*

552 To test for differentially expressed genes among the different populations of prostate  
553 luminal cells, we have used a t-test on the datasets after de-noising them with *Randomly*. The p-  
554 value have been corrected for multiple hypothesis using Benjamini-Hochberg. We have used the  
555 implementation of (Wolf et al., 2018) with overestimation of the variance and comparison with a  
556 Wilcoxon test. Based on this analysis, we have selected genes with a corrected p-value smaller  
557 than 0.001.

### 558 **Mouse population similarity**

559 To calculate the phenotypic similitude/distance between epithelial populations in the  
560 mouse prostate, we have performed an analysis based on Optimal Transport (OT) (Kolouri et al.,  
561 2017; Villani, 2003). More specifically, we have used the Wasserstein-1 distance as a measure for  
562 phenotypic distance between cell populations, *i.e.*, among clusters in the latent space obtained after  
563 using *Randomly*. The Wasserstein-1 distance is defined as a distance function between probability

564 distributions in a given metric space. Assuming that the metric space is Euclidean, the Wasserstein-  
565 1 distance (Kolouri et al., 2017; Villani, 2003) is defined as:

$$566 \quad W_1(\mu, \nu) = \min \left\{ \int_{\mathbb{R}^d \times \mathbb{R}^d} \|y - x\| \gamma(dx, dy) : \gamma \in \text{couplings}(\mu, \nu) \right\}$$

567 It is also known as the earth mover's distance, in which each probability distribution can be seen  
568 as an amount of dirt piled in the metric space, with the Wasserstein distance corresponding to the  
569 cost of turning one pile into the other. In our case, we would be evaluating the cost of transforming  
570 one population into another.

571 The optimization of the Wasserstein calculation can be turned into an OT problem, based  
572 on the Sinkhorn algorithm and the entropic regularization technique (Altschuler et al., 2017; Chizat  
573 et al., 2018; Cuturi, 2013; Schmitzer, 2016). We have used the Python implementation of the  
574 package POT Python Optimal Transport library (<https://github.com/rflamary/POT>), which solves  
575 the entropic regularization OT problem and return the loss ( $W_1(\mu, \nu)$ ). We have used as metric  
576 cost matrix a Euclidean pairwise distance matrix and assumed that the cell populations correspond  
577 to uniform probability distributions defined in the latent space obtained after using *Randomly*.

578 To calculate the distances between populations, we have constructed a matrix of  
579 Wasserstein distances among the epithelial populations described in Figure 1 and visualized it  
580 using a heatmap and a hierarchical clustering (Figure 3A). We have also generated a tree-like  
581 visualization of all the information contained in the hierarchical clustering/heatmap using a  
582 neighbor joining algorithm (Schliep, 2011). The length of the branches in the tree is measured in  
583 units of the Wasserstein-1 distance (Figure 3B).

## 584 **Cross-species analysis**

585 We have performed a comparison between the epithelial populations in human and mouse  
586 based on OT and Wasserstein distance. To harmonize the human and mouse datasets, we first  
587 constructed a common latent space between the aggregated mouse data set and each of the three

588 human samples. To that end, we first looked for the mouse orthologous genes, and then normalized  
589 mouse and human separately using  $\log_2(1 + TPM)$ . We filtered out any gene which has an  
590 average expression smaller than 0.1 for human or mouse, and merged the two corresponding  
591 human and mouse datasets. Finally, we used *Randomly* to generate the common latent space.

592 We have used the Wasserstein distance to calculate the similitude among the clusters of  
593 points previously identified with the different mouse and human populations in Figures 1 and 4.  
594 We have visualized this with a set of nested heatmaps (Figure 4D-F) to make explicit which  
595 populations have the minimum Wasserstein distance between each human population and mouse  
596 populations.

597 We then validated the accuracy of this strategy. The first validation test is that the  
598 conserved epithelial populations Basal and Lum P in human have a minimum in the Wasserstein  
599 distance with their mouse equivalents. A second test of the robustness is to compare cell types that  
600 are known to be well-conserved across species, such as immune cells. As with the conserved  
601 epithelial cell types, the human immune cell populations have also a minimum Wasserstein  
602 distance with respect to the corresponding mouse immune populations.

603

## 604 **Data availability**

605           Single-cell RNA-sequencing data from this study have been deposited in the Gene  
606 Expression Omnibus (GEO) under the accession number GSE150692. All other data are available  
607 from the authors upon reasonable request.

608

609

## 610 **Acknowledgements**

611           We would like to thank Reuben Akabas, Sarah Bergren, Mykola Bordyuh, Eva Leung, Bo  
612 Li, Maximilian Marhold, Agnieszka Pastula, Luis Pina, Roxanne Toivanen, and Sven Wenske for  
613 their assistance with this project, and Cory Abate-Shen and Jia Li for comments on the manuscript.  
614 We thank Erin Bush and Peter Sims for assistance with single-cell sequencing in the Columbia  
615 Genomics and High Throughput Screening Shared Resource of the Herbert Irving Comprehensive  
616 Cancer Center, as well as the resources of the Cancer Center Flow Core Facility, which are  
617 supported in part by the Cancer Center Support Grant P30CA013696. We also thank Michael  
618 Kissner and Daniel Troast for assistance with flow cytometry in the Columbia Stem Cell Initiative  
619 Flow Cytometry Core, which is supported in part by S10OD026845. For assistance with electron  
620 microscopy, we thank Alice Liang, Chris Petzold, and Joseph Sall at the New York University  
621 Langone Health DART Microscopy Lab, which is partially funded by NYU Cancer Center Support  
622 Grant P30CA016087 and by S10OD019974. These studies were supported by grants from the NIH  
623 R01CA238005 (M.M.S.), U54CA193313 (R.R. and M.M.S.), P50CA211024 (B.D.R., M.M.S.,  
624 M.L.), K99CA194287 (M.S.), and by fellowships from the Department of Defense Prostate Cancer  
625 Research Program (W81XWH-18-1-0424; F.C.) and the National Science Foundation (L.C.).

626

627 **Author contributions**

628           Conceptualization (study design): R.R. and M.M.S.; Conceptualization (data interpretation  
629 and presentation): L.C., F.C., L.A., and M.M.S.; Methodology (computational): L.A.;  
630 Methodology (flow cytometry): F.C.; Investigation (single-cell analysis): L.A., L.C., F.C., and  
631 M.S.; Investigation (computational analysis): L.A.; Investigation (urogenital anatomy): L.C. and  
632 F.C.; Investigation (mouse prostate analysis): L.C., F.C., S.X., and W.L.; Investigation (flow  
633 cytometry): L.C. and F.C.; Investigation (organoid assays): F.C. and L.C.; Investigation (renal  
634 graft assays): L.C. and S.X.; Investigation (statistical analysis): L.C.; Investigation (human  
635 prostate analysis): F.C. and B.D.R.; Resources: H.H. and M.L.; Writing (original draft): L.C., L.A.,  
636 F.C. and M.M.S.; Writing (review and editing): L.C., F.C. L.A., M.S., S.X., R.R., and M.M.S.;  
637 Supervision: R.R. and M.M.S.; Funding acquisition: L.C., F.C., M.S., M.L., R.R., and M.M.S.

638

639

640 **Competing interests**

641           The authors declare that they have no competing interests.

642

## 643 **References**

- 644 Altschuler J, Niles-Weed J, Rigollet P. 2017. Near-linear time approximation algorithms for  
645 optimal transport via Sinkhorn iteration. *Advances in Neural Information Processing*  
646 *Systems* **30**.
- 647 Aparicio L, Bordyuh M, Blumberg AJ, Rabadan R. 2020. A random matrix theory approach to  
648 denoise single-cell data. *Patterns* <https://doi.org/10.1016/j.patter.2020.100035>.
- 649 Barros-Silva JD, Linn DE, Steiner I, Guo G, Ali A, Pakula H, Ashton G, Peset I, Brown M, Clarke  
650 NW, Bronson RT, Yuan GC, Orkin SH, Li Z, Baena E. 2018. Single-cell analysis identifies  
651 LY6D as a marker linking castration-resistant prostate luminal cells to prostate progenitors  
652 and cancer. *Cell Rep* **25**: 3504-3518 e3506. 10.1016/j.celrep.2018.11.069, PMID:  
653 30566873
- 654 Berquin IM, Min Y, Wu R, Wu H, Chen YQ. 2005. Expression signature of the mouse prostate. *J*  
655 *Biol Chem* **280**: 36442-36451. 10.1074/jbc.M504945200, PMID: 16055444
- 656 Bhatia-Gaur R, Donjacour AA, Sciavolino PJ, Kim M, Desai N, Young P, Norton CR, Gridley T,  
657 Cardiff RD, Cunha GR, Abate-Shen C, Shen MM. 1999. Roles for *Nkx3.1* in prostate  
658 development and cancer. *Genes Dev* **13**: 966-977. PMID: 10215624
- 659 Blomqvist SR, Vidarsson H, Soder O, Enerback S. 2006. Epididymal expression of the forkhead  
660 transcription factor Foxi1 is required for male fertility. *EMBO J* **25**: 4131-4141.  
661 10.1038/sj.emboj.7601272, PMID: 16932748
- 662 Burger PE, Xiong X, Coetzee S, Salm SN, Moscatelli D, Goto K, Wilson EL. 2005. Sca-1  
663 expression identifies stem cells in the proximal region of prostatic ducts with high capacity  
664 to reconstitute prostatic tissue. *Proc Natl Acad Sci USA* **102**: 7180-7185. PMID: 15899981
- 665 Chizat L, Peyre G, Schmitzer B, Vialard F-X. 2018. Scaling algorithms for unbalanced optimal  
666 transport problems. *Mathematics of Computation* **87**: 2563-2609.



- 667 Choi N, Zhang B, Zhang L, Ittmann M, Xin L. 2012. Adult murine prostate basal and luminal cells  
668 are self-sustained lineages that can both serve as targets for prostate cancer initiation.  
669 *Cancer Cell* **21**: 253-265. 10.1016/j.ccr.2012.01.005, PMID: 22340597
- 670 Chua CW, Epsi NJ, Leung EY, Xuan S, Lei M, Li BI, Bergren SK, Hibshoosh H, Mitrofanova A,  
671 Shen MM. 2018. Differential requirements of androgen receptor in luminal progenitors  
672 during prostate regeneration and tumor initiation. *Elife* **7**. 10.7554/eLife.28768, PMID:  
673 29334357
- 674 Chua CW, Shibata M, Lei M, Toivanen R, Barlow LJ, Bergren SK, Badani KK, McKiernan JM,  
675 Benson MC, Hibshoosh H, Shen MM. 2014. Single luminal epithelial progenitors can  
676 generate prostate organoids in culture. *Nat Cell Biol* **16**: 951-961. 10.1038/ncb3047,  
677 PMID: 25241035
- 678 Crowell PD, Fox JJ, Hashimoto T, Diaz JA, Navarro HI, Henry GH, Feldmar BA, Lowe MG,  
679 Garcia AJ, Wu YE, Sajed DP, Strand DW, Goldstein AS. 2019. Expansion of luminal  
680 progenitor cells in the aging mouse and human prostate. *Cell Rep* **28**: 1499-1510 e1496.  
681 10.1016/j.celrep.2019.07.007, PMID: 31390564
- 682 Cunha GR, Donjacour AA, Cooke PS, Mee S, Bigsby RM, Higgins SJ, Sugimura Y. 1987. The  
683 endocrinology and developmental biology of the prostate. *Endocr Rev* **8**: 338-362.  
684 10.1210/edrv-8-3-338, PMID: 3308446
- 685 Cunha GR, Vezina CM, Isaacson D, Ricke WA, Timms BG, Cao M, Franco O, Baskin LS. 2018.  
686 Development of the human prostate. *Differentiation* **103**: 24-45.  
687 10.1016/j.diff.2018.08.005, PMID: 30224091
- 688 Cuturi M. 2013. Sinkhorn distances: Lightspeed computation of optimal transport. *Advances in*  
689 *Neural Information Processing Systems* **26**.

- 690 Drost J, Karthaus WR, Gao D, Driehuis E, Sawyers CL, Chen Y, Clevers H. 2016. Organoid  
691 culture systems for prostate epithelial and cancer tissue. *Nat Protoc* **11**: 347-358.  
692 10.1038/nprot.2016.006, PMID: 26797458
- 693 Georgas KM, Armstrong J, Keast JR, Larkins CE, McHugh KM, Southard-Smith EM, Cohn MJ,  
694 Batourina E, Dan H, Schneider K, Buehler DP, Wiese CB, Brennan J, Davies JA, Harding  
695 SD, Baldock RA, Little MH, Vezina CM, Mendelsohn C. 2015. An illustrated anatomical  
696 ontology of the developing mouse lower urogenital tract. *Development* **142**: 1893-1908.  
697 10.1242/dev.117903, PMID: 25968320
- 698 Goldstein AS, Lawson DA, Cheng D, Sun W, Garraway IP, Witte ON. 2008. Trop2 identifies a  
699 subpopulation of murine and human prostate basal cells with stem cell characteristics. *Proc*  
700 *Natl Acad Sci USA* **105**: 20882-20887. 10.1073/pnas.0811411106, PMID: 19088204
- 701 Goto K, Salm SN, Coetzee S, Xiong X, Burger PE, Shapiro E, Lepor H, Moscatelli D, Wilson EL.  
702 2006. Proximal prostatic stem cells are programmed to regenerate a proximal-distal ductal  
703 axis. *Stem Cells* **24**: 1859-1868. PMID: 16644920
- 704 Ittmann M. 2018. Anatomy and histology of the human and murine prostate. *Cold Spring Harb*  
705 *Perspect Med* **8**. 10.1101/cshperspect.a030346, PMID: 29038334
- 706 Ittmann M, Huang J, Radaelli E, Martin P, Signoretti S, Sullivan R, Simons BW, Ward JM,  
707 Robinson BD, Chu GC, Loda M, Thomas G, Borowsky A, Cardiff RD. 2013. Animal  
708 models of human prostate cancer: the consensus report of the New York meeting of the  
709 Mouse Models of Human Cancers Consortium Prostate Pathology Committee. *Cancer Res*  
710 **73**: 2718-2736. 10.1158/0008-5472.CAN-12-4213, PMID: 23610450
- 711 Joseph DB, Henry GH, Malewska A, Iqbal NS, Ruetten HM, Turco AE, Abler LL, Sandhu SK,  
712 Cadena MT, Malladi VS, Reese JC, Mauck RJ, Gahan JC, Hutchinson RC, Roehrborn CG,  
713 Baker LA, Vezina CM, Strand DW. 2020. Urethral luminal epithelia are castration-

- 714 insensitive progenitors of the proximal prostate. *bioRxiv*: 2020.2002.2019.937615.  
715 10.1101/2020.02.19.937615,
- 716 Karthaus WR, Hofree M, Choi D, Linton EL, Turkekul M, Bejnood A, Carver B, Gopalan A,  
717 Abida W, Laudone V, Biton M, Chaudhary O, Xu T, Masilionis I, Manova K, Mazutis L,  
718 Pe'er D, Regev A, Sawyers CL. 2020. Regenerative potential of prostate luminal cells  
719 revealed by single-cell analysis. *Science* **368**: 497-505. 10.1126/science.aay0267, PMID:  
720 32355025
- 721 Karthaus WR, Iaquinta PJ, Drost J, Gracanin A, van Boxtel R, Wongvipat J, Dowling CM, Gao  
722 D, Begthel H, Sachs N, Vries RG, Cuppen E, Chen Y, Sawyers CL, Clevers HC. 2014.  
723 Identification of multipotent luminal progenitor cells in human prostate organoid cultures.  
724 *Cell* **159**: 163-175. 10.1016/j.cell.2014.08.017, PMID: 25201529
- 725 Kolouri S, Park S, Thorpe M, Slepcev D, Rohde GK. 2017. Optimal Mass Transport: Signal  
726 processing and machine-learning applications. *IEEE Signal Process Mag* **34**: 43-59.  
727 10.1109/MSP.2017.2695801, PMID: 29962824
- 728 Kwon OJ, Zhang L, Ittmann MM, Xin L. 2014. Prostatic inflammation enhances basal-to-luminal  
729 differentiation and accelerates initiation of prostate cancer with a basal cell origin. *Proc*  
730 *Natl Acad Sci USA* **111**: E592-600. 10.1073/pnas.1318157111, PMID: 24367088
- 731 Kwon OJ, Zhang L, Xin L. 2016. Stem Cell Antigen-1 identifies a distinct androgen-independent  
732 murine prostatic luminal cell lineage with bipotent potential. *Stem Cells* **34**: 191-202.  
733 10.1002/stem.2217, PMID: 26418304
- 734 Kwon OJ, Zhang Y, Li Y, Wei X, Zhang L, Chen R, Creighton CJ, Xin L. 2019. Functional  
735 Heterogeneity of Mouse Prostate Stromal Cells Revealed by Single-Cell RNA-Seq.  
736 *iScience* **13**: 328-338. 10.1016/j.isci.2019.02.032, PMID: 30878879

- 737 Lawson DA, Xin L, Lukacs RU, Cheng D, Witte ON. 2007. Isolation and functional  
738 characterization of murine prostate stem cells. *Proc Natl Acad Sci USA* **104**: 181-186.  
739 10.1073/pnas.0609684104, PMID: 17185413
- 740 Lin Y, Liu G, Zhang Y, Hu YP, Yu K, Lin C, McKeehan K, Xuan JW, Ornitz DM, Shen MM,  
741 Greenberg N, McKeehan WL, Wang F. 2007. Fibroblast growth factor receptor 2 tyrosine  
742 kinase is required for prostatic morphogenesis and the acquisition of strict androgen  
743 dependency for adult tissue homeostasis. *Development* **134**: 723-734. dev.02765, PMID:  
744 17215304
- 745 Liu X, Grogan TR, Hieronymus H, Hashimoto T, Mottahedeh J, Cheng D, Zhang L, Huang K,  
746 Stoyanova T, Park JW, Shkhyan RO, Nowroozizadeh B, Rettig MB, Sawyers CL, Elashoff  
747 D, Horvath S, Huang J, Witte ON, Goldstein AS. 2016. Low CD38 identifies progenitor-  
748 like inflammation-associated luminal cells that can initiate human prostate cancer and  
749 predict poor outcome. *Cell Rep* **17**: 2596-2606. 10.1016/j.celrep.2016.11.010, PMID:  
750 27926864
- 751 Lu TL, Huang YF, You LR, Chao NC, Su FY, Chang JL, Chen CM. 2013. Conditionally ablated  
752 Pten in prostate basal cells promotes basal-to-luminal differentiation and causes invasive  
753 prostate cancer in mice. *Am J Pathol* **182**: 975-991. 10.1016/j.ajpath.2012.11.025, PMID:  
754 23313138
- 755 Madisen L, Zwingman TA, Sunkin SM, Oh SW, Zariwala HA, Gu H, Ng LL, Palmiter RD,  
756 Hawrylycz MJ, Jones AR, Lein ES, Zeng H. 2010. A robust and high-throughput Cre  
757 reporting and characterization system for the whole mouse brain. *Nat Neurosci* **13**: 133-  
758 140. 10.1038/nn.2467, PMID: 20023653
- 759 Moad M, Hannezo E, Buczacki SJ, Wilson L, El-Sherif A, Sims D, Pickard R, Wright NA,  
760 Williamson SC, Turnbull DM, Taylor RW, Greaves L, Robson CN, Simons BD, Heer R.  
761 2017. Multipotent basal stem cells, maintained in localized proximal niches, support

- 762 directed long-ranging epithelial flows in human prostates. *Cell Rep* **20**: 1609-1622.  
763 10.1016/j.celrep.2017.07.061, PMID: 28813673
- 764 Montoro DT, Haber AL, Biton M, Vinarsky V, Lin B, Birket SE, Yuan F, Chen S, Leung HM,  
765 Villoria J, Rogel N, Burgin G, Tsankov AM, Waghray A, Slyper M, Waldman J, Nguyen  
766 L, Dionne D, Rozenblatt-Rosen O, Tata PR, Mou H, Shivaraju M, Bihler H, Mense M,  
767 Tearney GJ, Rowe SM, Engelhardt JF, Regev A, Rajagopal J. 2018. A revised airway  
768 epithelial hierarchy includes CFTR-expressing ionocytes. *Nature* **560**: 319-324.  
769 10.1038/s41586-018-0393-7, PMID: 30069044
- 770 Morris SA. 2019. The evolving concept of cell identity in the single cell era. *Development* **146**.  
771 10.1242/dev.169748, PMID: 31249002
- 772 Rueden CT, Schindelin J, Hiner MC, DeZonia BE, Walter AE, Arena ET, Eliceiri KW. 2017.  
773 ImageJ2: ImageJ for the next generation of scientific image data. *BMC Bioinformatics* **18**:  
774 529. 10.1186/s12859-017-1934-z, PMID: 29187165
- 775 Schaefer BC, Schaefer ML, Kappler JW, Marrack P, Kedl RM. 2001. Observation of antigen-  
776 dependent CD8<sup>+</sup> T-cell/ dendritic cell interactions in vivo. *Cell Immunol* **214**: 110-122.  
777 10.1006/cimm.2001.1895, PMID: 12088410
- 778 Schindelin J, Arganda-Carreras I, Frise E, Kaynig V, Longair M, Pietzsch T, Preibisch S, Rueden  
779 C, Saalfeld S, Schmid B, Tinevez JY, White DJ, Hartenstein V, Eliceiri K, Tomancak P,  
780 Cardona A. 2012. Fiji: an open-source platform for biological-image analysis. *Nat Methods*  
781 **9**: 676-682. 10.1038/nmeth.2019, PMID: 22743772
- 782 Schliep KP. 2011. phangorn: phylogenetic analysis in R. *Bioinformatics* **27**: 592-593.  
783 10.1093/bioinformatics/btq706, PMID: 21169378
- 784 Schmitzer B. 2016. Stabilized sparse scaling algorithms for entropy regularized transport  
785 problems. *arXiv*. 1610:06519,

- 786 Shappell SB, Thomas GV, Roberts RL, Herbert R, Ittmann MM, Rubin MA, Humphrey PA,  
787 Sundberg JP, Rozengurt N, Barrios R, Ward JM, Cardiff RD. 2004. Prostate pathology of  
788 genetically engineered mice: definitions and classification. The consensus report from the  
789 Bar Harbor meeting of the Mouse Models of Human Cancer Consortium Prostate  
790 Pathology Committee. *Cancer Res* **64**: 2270-2305. PMID: 15026373
- 791 Shen MM, Abate-Shen C. 2010. Molecular genetics of prostate cancer: new prospects for old  
792 challenges. *Genes Dev* **24**: 1967-2000. 10.1101/gad.1965810, PMID: 20844012
- 793 Stuart T, Butler A, Hoffman P, Hafemeister C, Papalexi E, Mauck WM, 3rd, Hao Y, Stoeckius M,  
794 Smibert P, Satija R. 2019. Comprehensive integration of single-cell data. *Cell* **177**: 1888-  
795 1902. 10.1016/j.cell.2019.05.031, PMID: 31178118
- 796 Thomsen MK, Butler CM, Shen MM, Swain A. 2008. Sox9 is required for prostate development.  
797 *Dev Biol* **316**: 302-311. 10.1016/j.ydbio.2008.01.030, PMID: 18325490
- 798 Toivanen R, Mohan A, Shen MM. 2016. Basal progenitors contribute to repair of the prostate  
799 epithelium following induced luminal anoikis. *Stem Cell Reports* **6**: 660-667.  
800 10.1016/j.stemcr.2016.03.007, PMID: 27117783
- 801 Toivanen R, Shen MM. 2017. Prostate organogenesis: tissue induction, hormonal regulation and  
802 cell type specification. *Development* **144**: 1382-1398. 10.1242/dev.148270, PMID:  
803 28400434
- 804 Tsujimura A, Koikawa Y, Salm S, Takao T, Coetzee S, Moscatelli D, Shapiro E, Lepor H, Sun  
805 TT, Wilson EL. 2002. Proximal location of mouse prostate epithelial stem cells: a model  
806 of prostatic homeostasis. *J Cell Biol* **157**: 1257-1265. PMID: 12082083
- 807 Villani C. 2003. Topics in optimal transportation. *American Mathematical Soc* **58**.
- 808 Wang X, Xu H, Cheng C, Ji Z, Zhao H, Sheng Y, Li X, Wang J, Shu Y, He Y, Fan L, Dong B,  
809 Xue W, Wai Chua C, Wu D, Gao WQ, He Zhu H. 2020. Identification of a Zeb1 expressing

- 810 basal stem cell subpopulation in the prostate. *Nat Commun* **11**: 706. 10.1038/s41467-020-  
811 14296-y, PMID: 32024836
- 812 Wang ZA, Mitrofanova A, Bergren SK, Abate-Shen C, Cardiff RD, Califano A, Shen MM. 2013.  
813 Lineage analysis of basal epithelial cells reveals their unexpected plasticity and supports a  
814 cell-of-origin model for prostate cancer heterogeneity. *Nat Cell Biol* **15**: 274-283.  
815 10.1038/ncb2697, PMID: 23434823
- 816 Wang ZA, Toivanen R, Bergren SK, Chambon P, Shen MM. 2014. Luminal cells are favored as  
817 the cell of origin for prostate cancer. *Cell Rep* **8**: 1339-1346. 10.1016/j.celrep.2014.08.002,  
818 PMID: 25176651
- 819 Wei X, Zhang L, Zhou Z, Kwon OJ, Zhang Y, Nguyen H, Dumpit R, True L, Nelson P, Dong B,  
820 Xue W, Birchmeier W, Taketo MM, Xu F, Creighton CJ, Ittmann MM, Xin L. 2019.  
821 Spatially Restricted Stromal Wnt Signaling Restrains Prostate Epithelial Progenitor  
822 Growth through Direct and Indirect Mechanisms. *Cell Stem Cell* **24**: 753-768 e756.  
823 10.1016/j.stem.2019.03.010, PMID: 30982770
- 824 Wolf FA, Angerer P, Theis FJ. 2018. SCANPY: large-scale single-cell gene expression data  
825 analysis. *Genome Biol* **19**: 15. 10.1186/s13059-017-1382-0, PMID: 29409532
- 826 Xin L. 2019. Cells of origin for prostate cancer. *Adv Exp Med Biol* **1210**: 67-86. 10.1007/978-3-  
827 030-32656-2\_4, PMID: 31900905
- 828 Xin L, Ide H, Kim Y, Dubey P, Witte ON. 2003. In vivo regeneration of murine prostate from  
829 dissociated cell populations of postnatal epithelia and urogenital sinus mesenchyme. *Proc*  
830 *Natl Acad Sci U S A* **100 Suppl 1**: 11896-11903. PMID: 12909713
- 831 Zhang D, Jeter C, Gong S, Tracz A, Lu Y, Shen J, Tang DG. 2018. Histone 2B-GFP label-retaining  
832 prostate luminal cells possess progenitor cell properties and are intrinsically resistant to  
833 castration. *Stem Cell Reports* **10**: 228-242. 10.1016/j.stemcr.2017.11.016, PMID:  
834 29276153

- 835 Zhang Y, Zhang J, Lin Y, Lan Y, Lin C, Xuan JW, Shen MM, McKeehan WL, Greenberg NM,  
836 Wang F. 2008. Role of epithelial cell fibroblast growth factor receptor substrate 2alpha in  
837 prostate development, regeneration and tumorigenesis. *Development* **135**: 775-784.  
838 dev.009910 10.1242/dev.009910, PMID: 18184727
- 839 Zhao SG, Chang SL, Erho N, Yu M, Lehrer J, Alshalalfa M, Speers C, Cooperberg MR, Kim W,  
840 Ryan CJ, Den RB, Freedland SJ, Posadas E, Sandler H, Klein EA, Black P, Seiler R,  
841 Tomlins SA, Chinnaiyan AM, Jenkins RB, Davicioni E, Ross AE, Schaeffer EM, Nguyen  
842 PL, Carroll PR, Karnes RJ, Spratt DE, Feng FY. 2017. Associations of luminal and basal  
843 subtyping of prostate cancer with prognosis and response to androgen deprivation therapy.  
844 *JAMA Oncol* **3**: 1663-1672. 10.1001/jamaoncol.2017.0751, PMID: 28494073
- 845



## 846 **Figure Legends**

847 **Figure 1. Single-cell analysis identifies prostate luminal epithelial heterogeneity.** (A) *t*-  
848 distributed stochastic neighbor embedding (tSNE) plot of 5,288 cells from an aggregated dataset  
849 of two normal mouse prostates, processed by *Randomly* and clustered using the Leiden algorithm.  
850 (B) tSNE representation of each prostate lobe (AP: 2,735 cells; DP: 1,781 cells; LP: 2,044 cells;  
851 VP: 1,581 cells). (C) Schematic model of prostate lobes with the urethral rhabosphincter partially  
852 removed, with the distribution of luminal epithelial populations indicated. (D) Dot plot of gene  
853 expression levels in each epithelial population for selected marker genes. (E) Ridge plots of marker  
854 genes showing expression in each population. (F) Hematoxylin-eosin (H&E) and  
855 immunofluorescence images of selected markers in serial sections; the periurethral/proximal  
856 region shown is from the AP and DP. Arrow in VP distal indicates distal cell with *Ppp1r1b*  
857 expression. Scale bars indicate 50 microns.

858

859 **Figure 1—figure supplement 1. Anatomy and dissection of mouse prostate lobes.** (A)  
860 Schematic of connections of prostate lobes to the urethra. Note that the AP, DP, and LP connect  
861 dorsally in close proximity, whereas the VP connects on the ventral side. (B) Whole-mount views  
862 of prostate lobe connections in *Ubc-GFP* mice. (C) H&E staining of transverse section through  
863 intact urogenital apparatus. The LP crosses the rhabdosphincter caudally (right), and the  
864 periurethral (PrU) region lies within the rhabdosphincter. (D,E) Bright-field and epifluorescence  
865 views of dissected prostate lobes from *Ubc-GFP* mouse. Proximal regions are oriented  
866 downwards; note that the LP is the smallest lobe and has a relatively long unbranched region. (F)  
867 H&E staining of sections from the indicated lobes. Scale bars in (B-E) indicate 2 mm, in (F)  
868 indicate 50 microns.

869

870 **Figure 1—figure supplement 2. Random-matrix analysis of single-cell datasets.** Comparison  
871 of dimensional reduction, clustering and visualization of 2,322 sequenced cells from the mouse  
872 anterior lobe, based on traditional PCA **(A-D)**, and the *Randomly* algorithm **(E-J)**. **(A)** “Elbow  
873 plot” describing the variance ratio of each principal component (PC) after a PCA reduction of the  
874  $\log_2(1+TPM)$  transformed count matrix. **(B)** Mean silhouette scores of the clusters obtained for  
875 different values of the Leiden resolution after performing a clustering in the first 11 PCs using the  
876 Leiden algorithm (as implemented in (Wolf et al., 2018)). **(C,D)** tSNE visualizations of the 11 PCs  
877 and clustering for Leiden resolutions of 0.2 (7 clusters) and 0.3 (8 clusters) respectively. The  
878 LumA\* cells have similar expression profiles as the LumA population, but display altered  
879 expression of ribosomal and mitochondrial genes, which is consistent with cellular stress. **(E)**  
880 Normality test to detect eigenvector localization in the 2,322 cell-eigenvectors of the z-scored  
881  $\log_2(1+TPM)$  transformed count matrix. The red line corresponds to the sparse data before  
882 *Randomly* and the green line shows eigenvector behavior after elimination of the sparsity-induced  
883 signal. **(F)** Spectral distribution of the Wishart matrix for selected cells after elimination of the  
884 sparsity-induced signal (blue histogram) with a Marchenko-Pastur (MP) distribution fit (red line).  
885 Only 50 eigenvalues (~2% of the total) lie outside the MP distribution, and their corresponding  
886 eigenvectors carry true signal. The remaining ~98% of the data is comparable to a random matrix  
887 and is therefore noise. **(G)** Chi-squared test for the variance of the genes’ projection into different  
888 sets of eigenvectors. Blue, the 50 signal-like eigenvectors; pink, the eigenvectors corresponding to  
889 the last 50 MP eigenvalues; green, the eigenvectors corresponding to the first 50 MP eigenvalues;  
890 brown, projection on 50 2,322-dimensional random vectors. **(H)** Selection of the genes that are  
891 mostly responsible for the signal in this dataset (purple line). The number of genes (orange line) is  
892 calculated with a false discovery rate (FDR) using the ratio of the blue and pink distributions in  
893 **(G)** Approximately 5000 genes are responsible for the signal using  $FDR \leq 0.001$ . **(I)** Mean  
894 silhouette score of the clusters obtained for different values of the Leiden resolution after  
895 processing with *Randomly*. In comparison with **(B)**, the score is much higher, indicating better  
896 clustering. **(J)** tSNE visualization of the latent space generated by *Randomly* and clustering

897 performed with the Leiden algorithm. For downstream analyses, we have combined the LumA\*  
898 cells with the LumA population. The number of clusters selected corresponds to the maximum of  
899 the curve in **(I)**. *Randomly* can assist in identification of populations (e.g., PrU) by removing noise  
900 and sparsity-induced signals, and by selecting genes responsible for the biological signal.

901  
902 **Figure 1—figure supplement 3. Additional marker validation for epithelial populations.**

903 *(Above)* Ridge plots of marker genes show expression in each population. *(Below)*  
904 Immunofluorescence staining of marker expression in sections; the periurethral/proximal region  
905 shown is from the AP and DP. Scale bars indicate 50 microns.

906  
907 **Figure 2. Luminal epithelial populations display spatial and morphological heterogeneity.**

908 **(A)** H&E and IF of serial sections from the DP and LP, showing expression of proximal (*Ppp1r1b*)  
909 and distal (*Tgm4*, *Msemb*) markers; note apparent differences in the boundary regions of the two  
910 lobes. **(B)** Detection of distally localized LumP cells (arrows) in all four lobes; these are most  
911 abundant in the VP. **(C)** Scanning electron micrographs of the boundary region of the AP; central  
912 low-power image is flanked by high-power images of boxed regions. Red arrow, mitochondria;  
913 black arrow, membrane interdigitation; blue arrow, Golgi apparatus; green arrow, rough  
914 endoplasmic reticulum. **(D)** Identification of the periurethral region. Cells in the periurethral region  
915 express Ly6d, Ck7, Aqp3, and Ppp1r1b; notably, Cldn10-expressing LumP cells decrease  
916 approaching the periurethral region **(E)** Lineage-marking in *Nkx3.1<sup>Cre/+</sup>; R26R-YFP* mice (n=3)  
917 shows widespread YFP expression in the periurethral, proximal, and distal AP; small patches  
918 remain unrecombined and lack YFP (arrows). Scale bars in **(A,B,D,E)** indicate 50 microns; scale  
919 bars in **(C)** indicate 2 microns.

920

921 **Figure 2—figure supplement 1. Additional analysis of proximal-distal heterogeneity. (A)**  
922 H&E and IF of serial sections from the AP and VP, showing expression of proximal (*Ppp1r1b*)  
923 and distal (*Tgm4*, *Trpv6*) markers. **(B)** Scanning electron micrographs of proximal and distal  
924 regions of the AP. *Left*: red arrows, mitochondria; black arrow, membrane interdigitation; *Right*:  
925 blue arrows, Golgi apparatus; green arrows, rough endoplasmic reticulum; yellow arrows,  
926 secretory vesicles near the apical surface. Scale bars in **(A)** indicate 50 microns; scale bars in **(B)**  
927 indicate 2 microns.

928  
929 **Figure 3. Functional analysis of epithelial populations in organoid and tissue reconstitution**  
930 **assays. (A)** Heatmap visualization of the Wasserstein distance between epithelial populations with  
931 hierarchical clustering. **(B)** Tree visualization of Wasserstein distances. **(C)** Flow sorting of  
932 distinct epithelial populations from the AP lobe. **(D)** Organoid formation assays using sorted  
933 epithelial cells in two distinct culture conditions. ENR conditions: sorted cells from Ubc-GFP mice  
934 plated at 1,000 cells/well, imaged at day 10. Hepatocyte Media (HM) conditions: sorted cells from  
935 wild type C57BL/6 mice plated at 2,000-5,000 cells/well and imaged on day 12-13. Maximum p-  
936 values for each pair-wise comparison are indicated. **(E)** Organoid formation efficiency plots. **(F)**  
937 Grafting efficiency in tissue reconstitution assays. LumP, PrU, and Basal are significantly more  
938 efficient at generating grafts from smaller number of cells relative to distal luminal populations  
939 (average p-value shown). **(G)** H&E and IF of sections from fully-differentiated renal grafts;  
940 positive staining corresponds to results found in  $\geq 3$  independent grafts. Scale bars indicate 50  
941 microns.

942  
943 **Figure 3—figure supplement 1. Additional marker analysis of renal grafts. (A)**  
944 Immunofluorescence staining of grafts using the indicated markers; arrows indicate regions of  
945 patchy expression. The left-most two columns show fully-differentiated graft regions, whereas the  
946 right-most column shows less-differentiated regions that are relatively small, have less abundant

947 basal cells, are typically found on the periphery of the graft, and have fewer secretions. These less-  
948 differentiated regions tend to express the LumP marker *Ppp1r1b*. **(B)** Immunofluorescence  
949 detection of GFP in grafts from *Ubc-GFP* mice demonstrates donor origin of grafted epithelial  
950 cells.

951  
952 **Figure 4. Heterogeneity and conservation of luminal populations in the human prostate. (A-**  
953 **C)** tSNE plot of scRNA-seq data (**A**, 1,600 cells; **B**, 2,303 cells; **C**, 2825 cells) from three  
954 independent human prostatectomy samples. **(D-F)** Heatmap visualization of Wasserstein distances  
955 between the human and mouse prostate populations for each dataset. **(G)** H&E and IF images of  
956 serial sections from human prostate, showing regions of the prostatic utricle, central, transition,  
957 and peripheral zones. Arrows indicate regions of ductal morphology. Scale bars indicate 50  
958 microns.

959  
960 **Figure 4—source data. Human prostate samples and corresponding clinical data.**

961

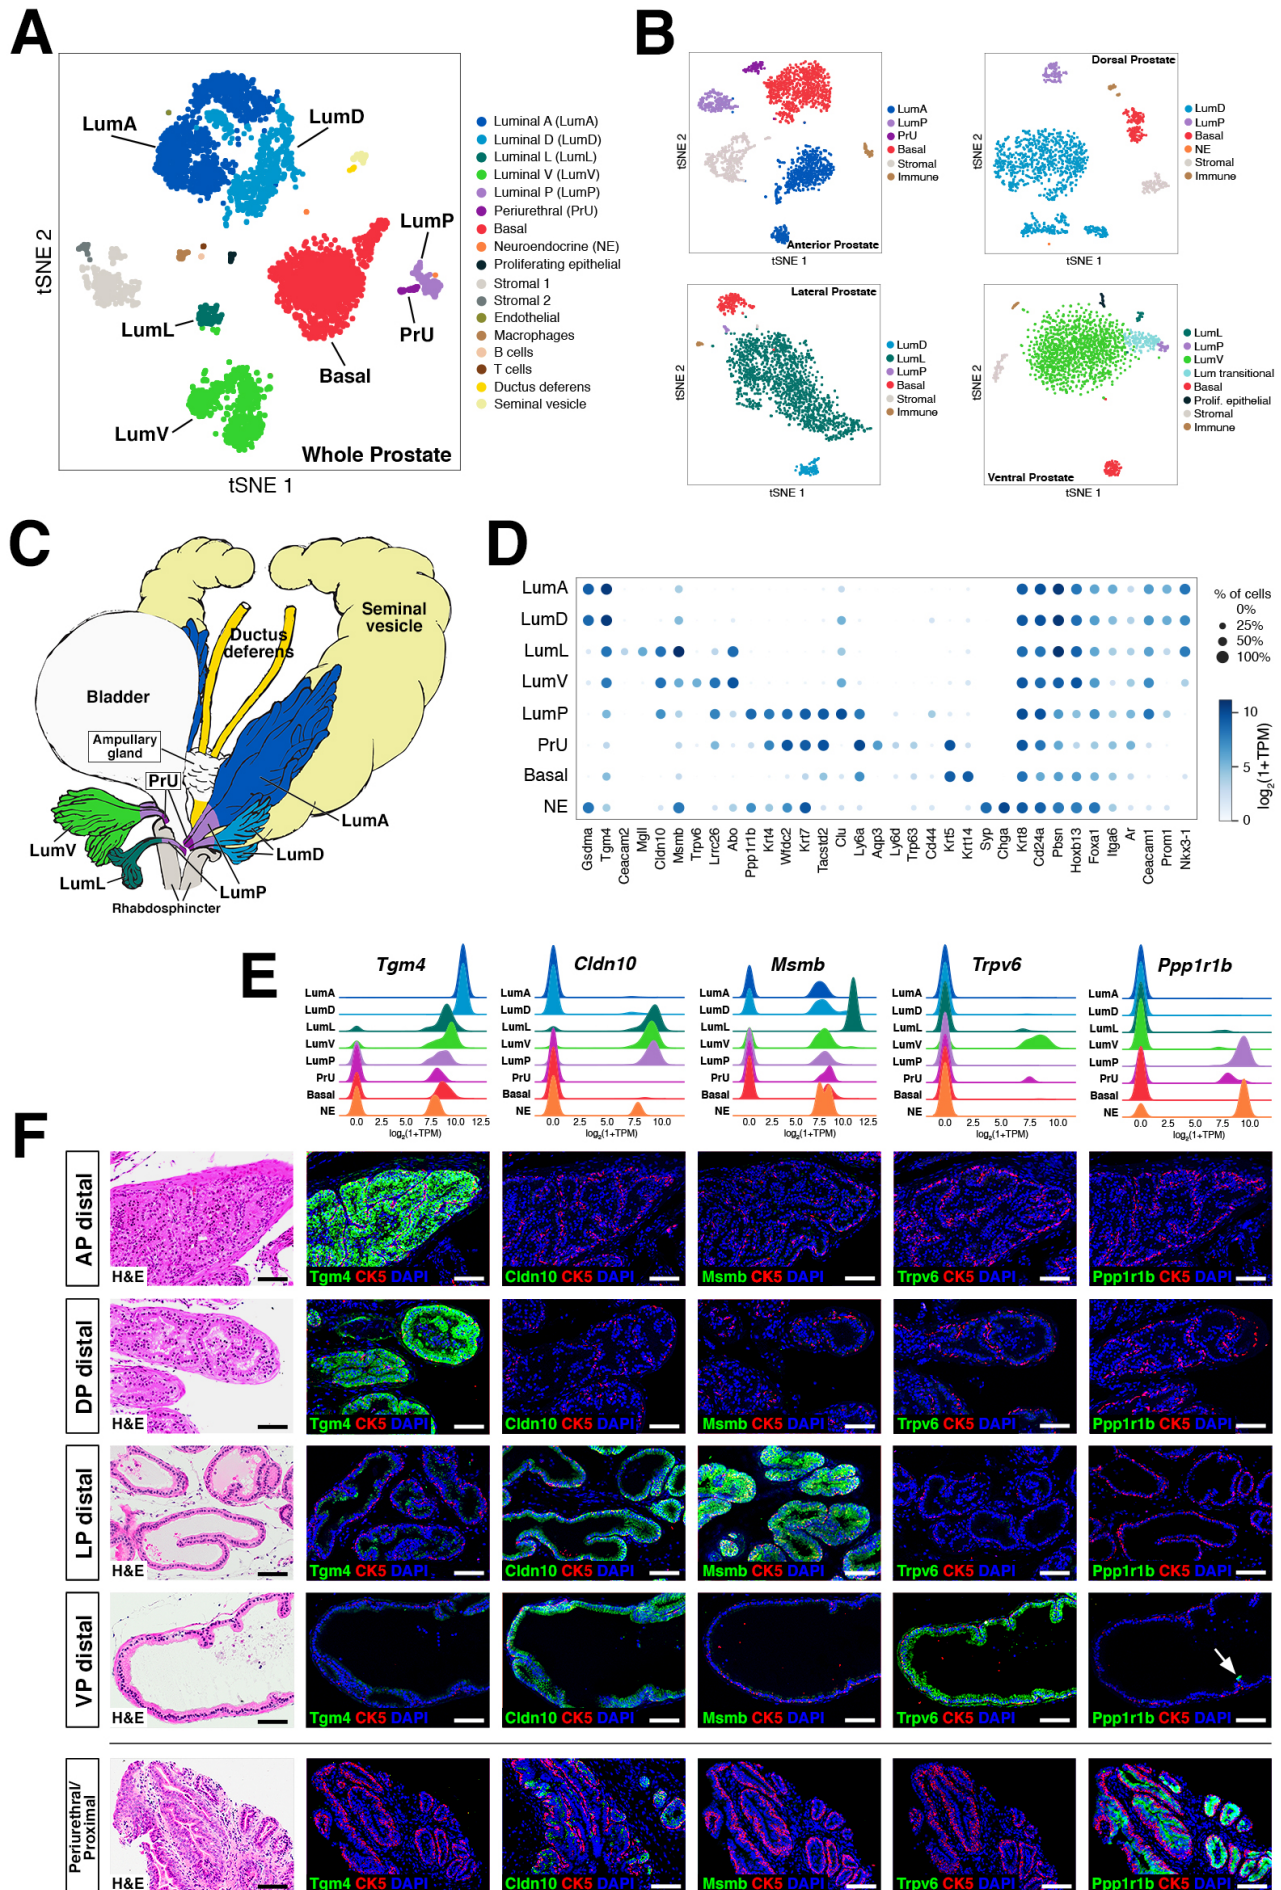

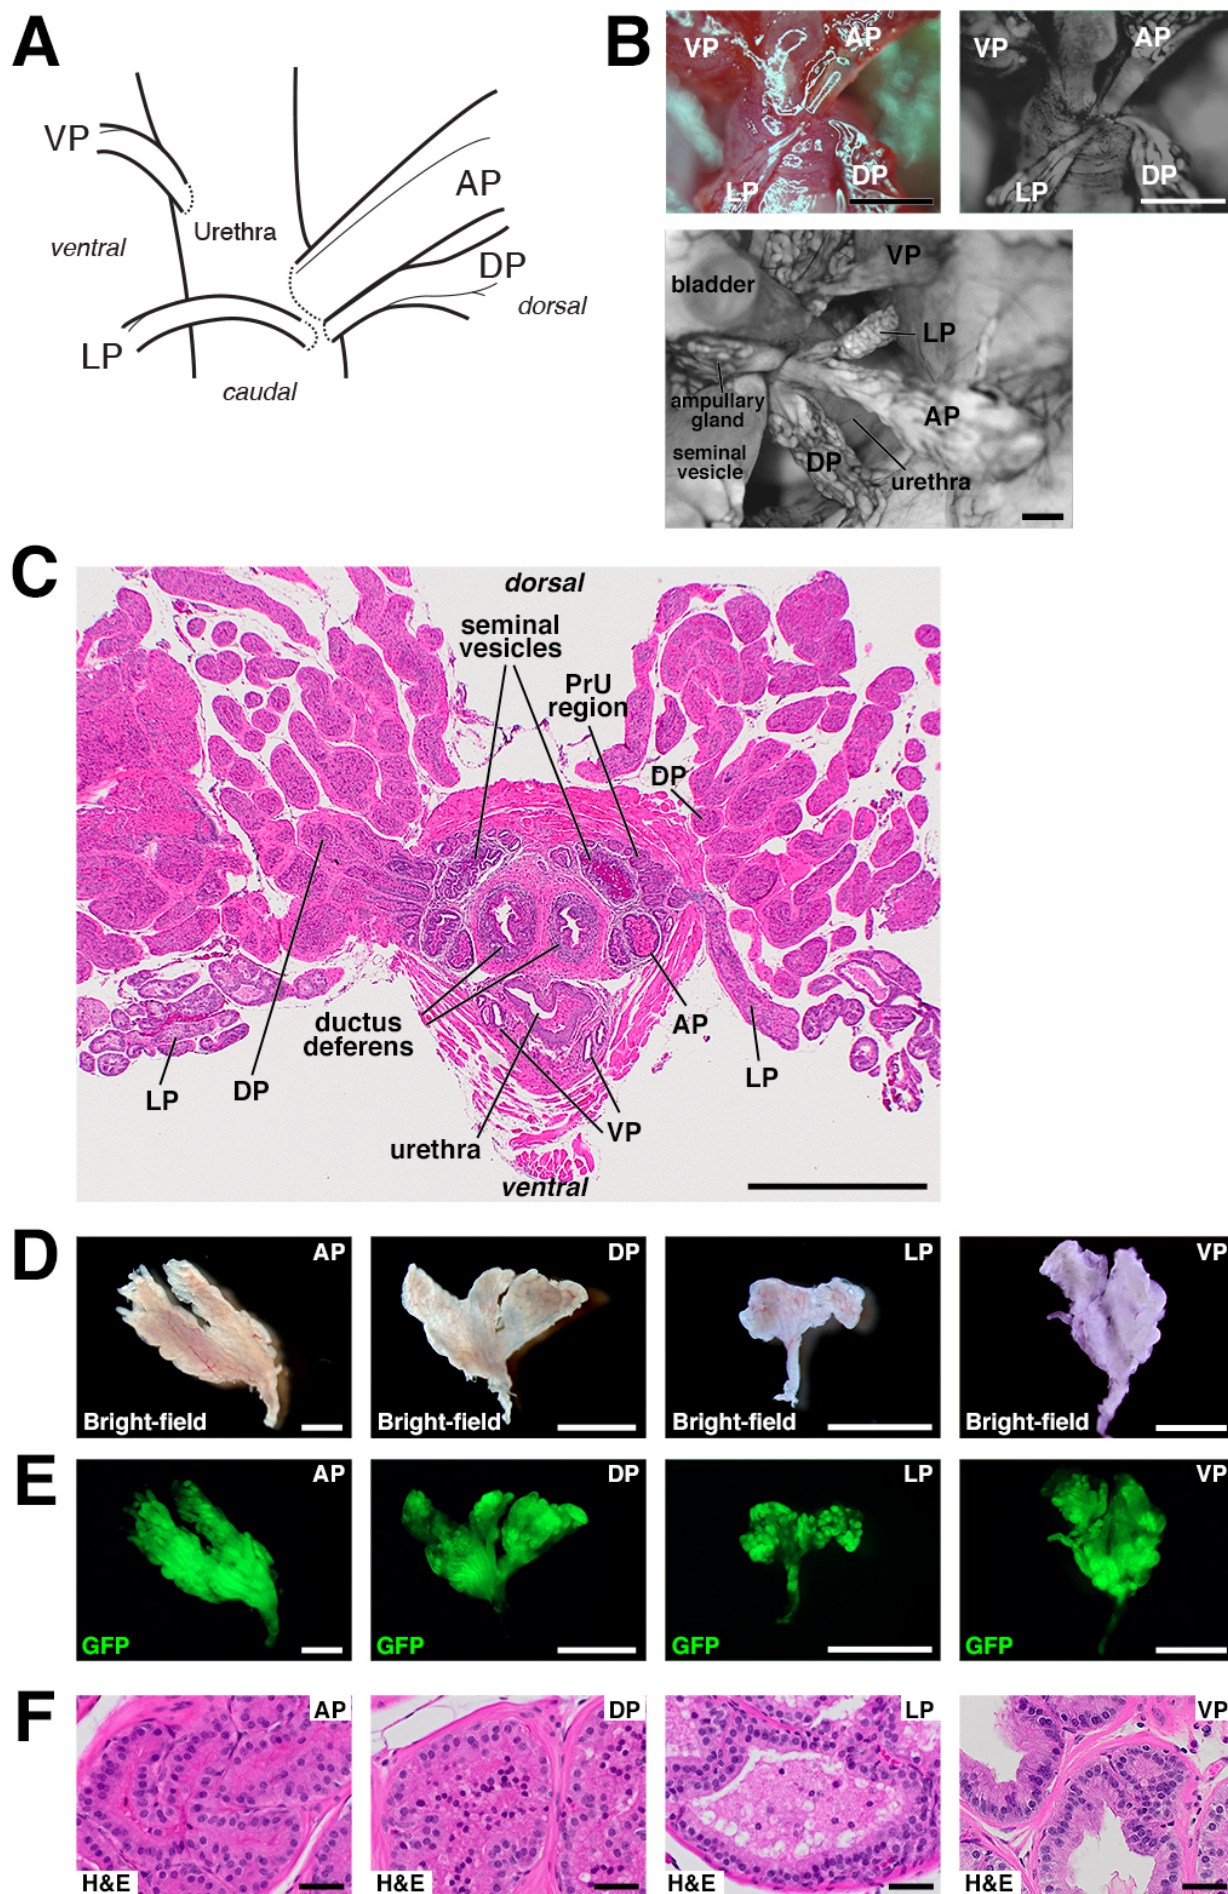

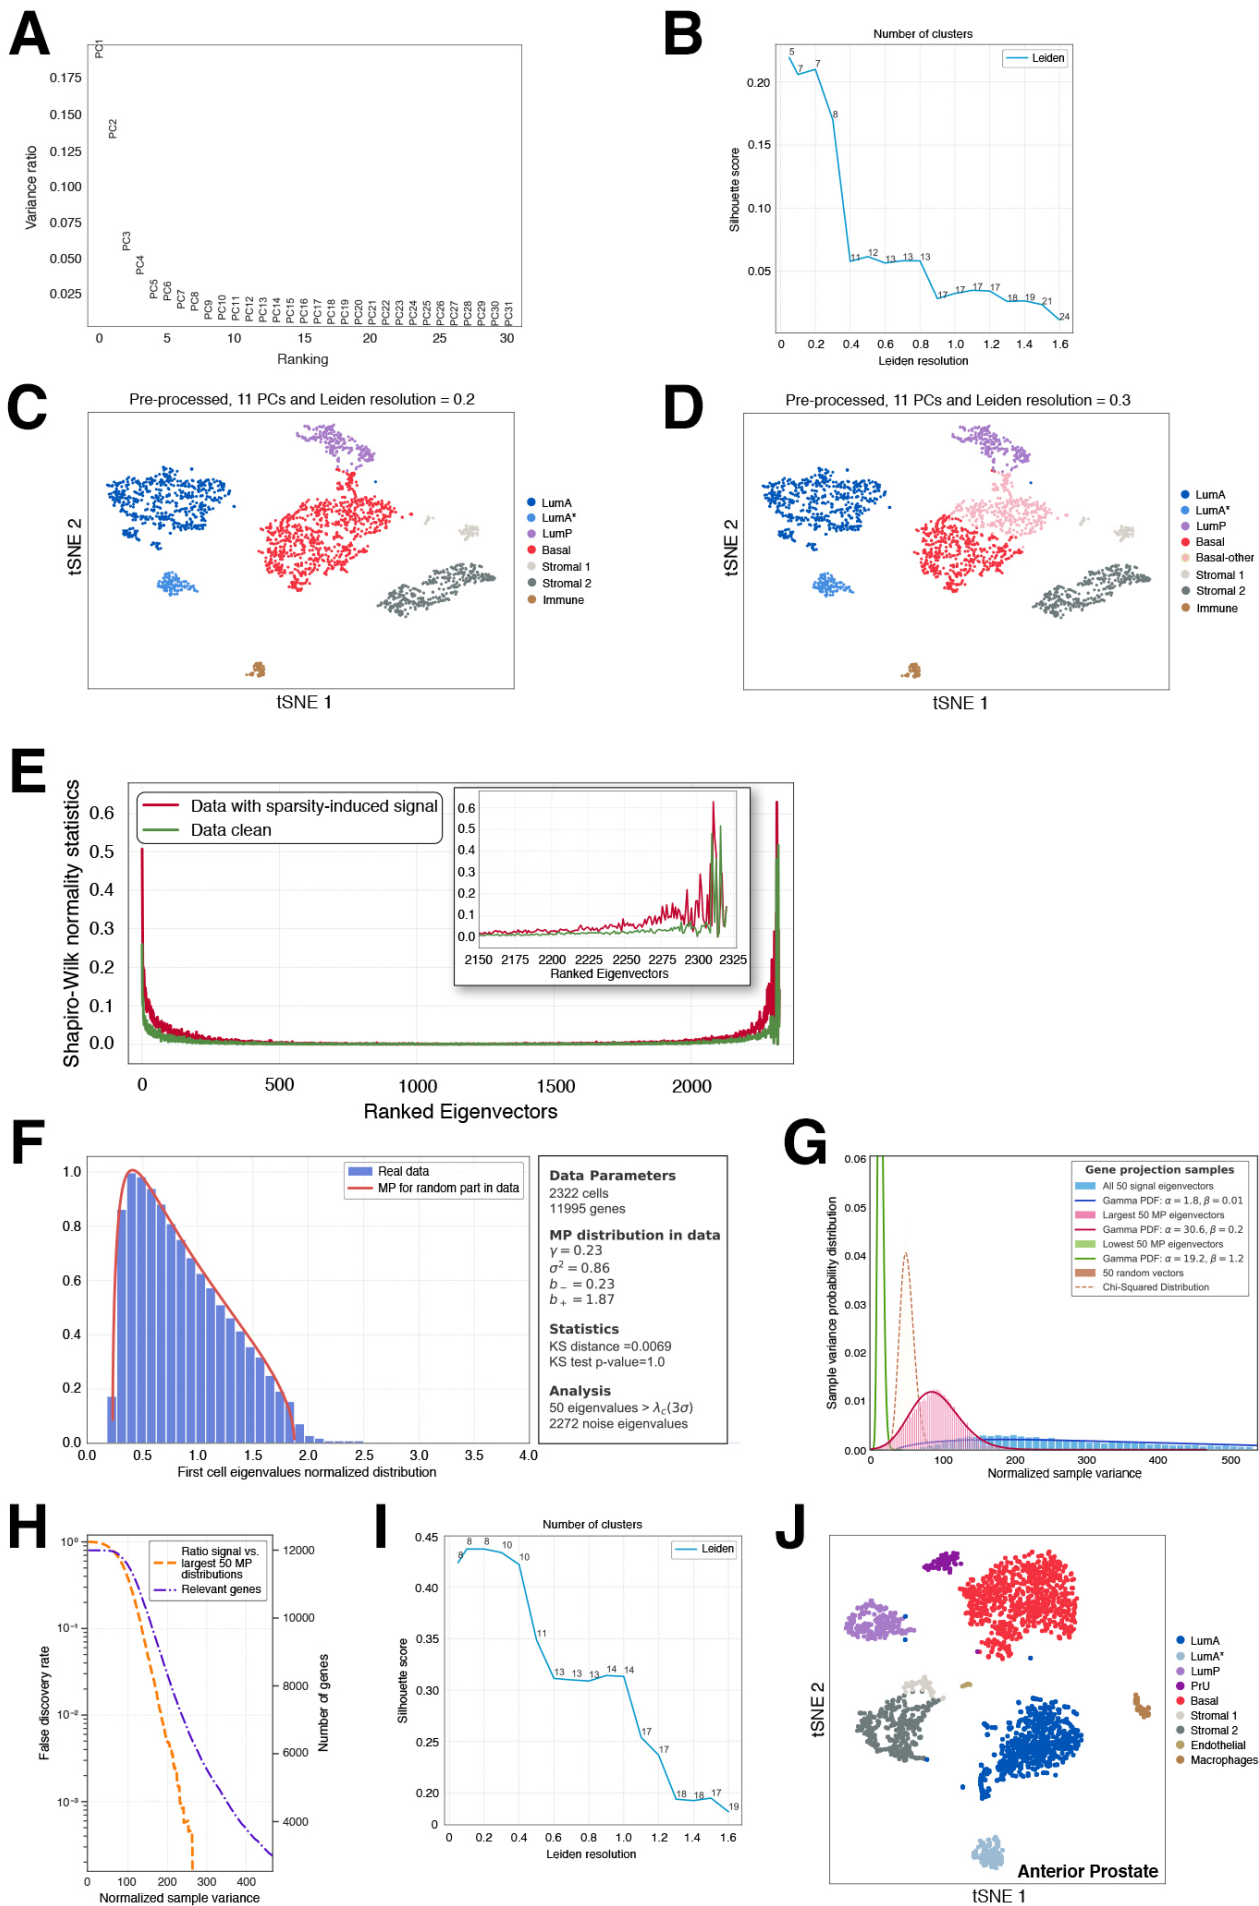



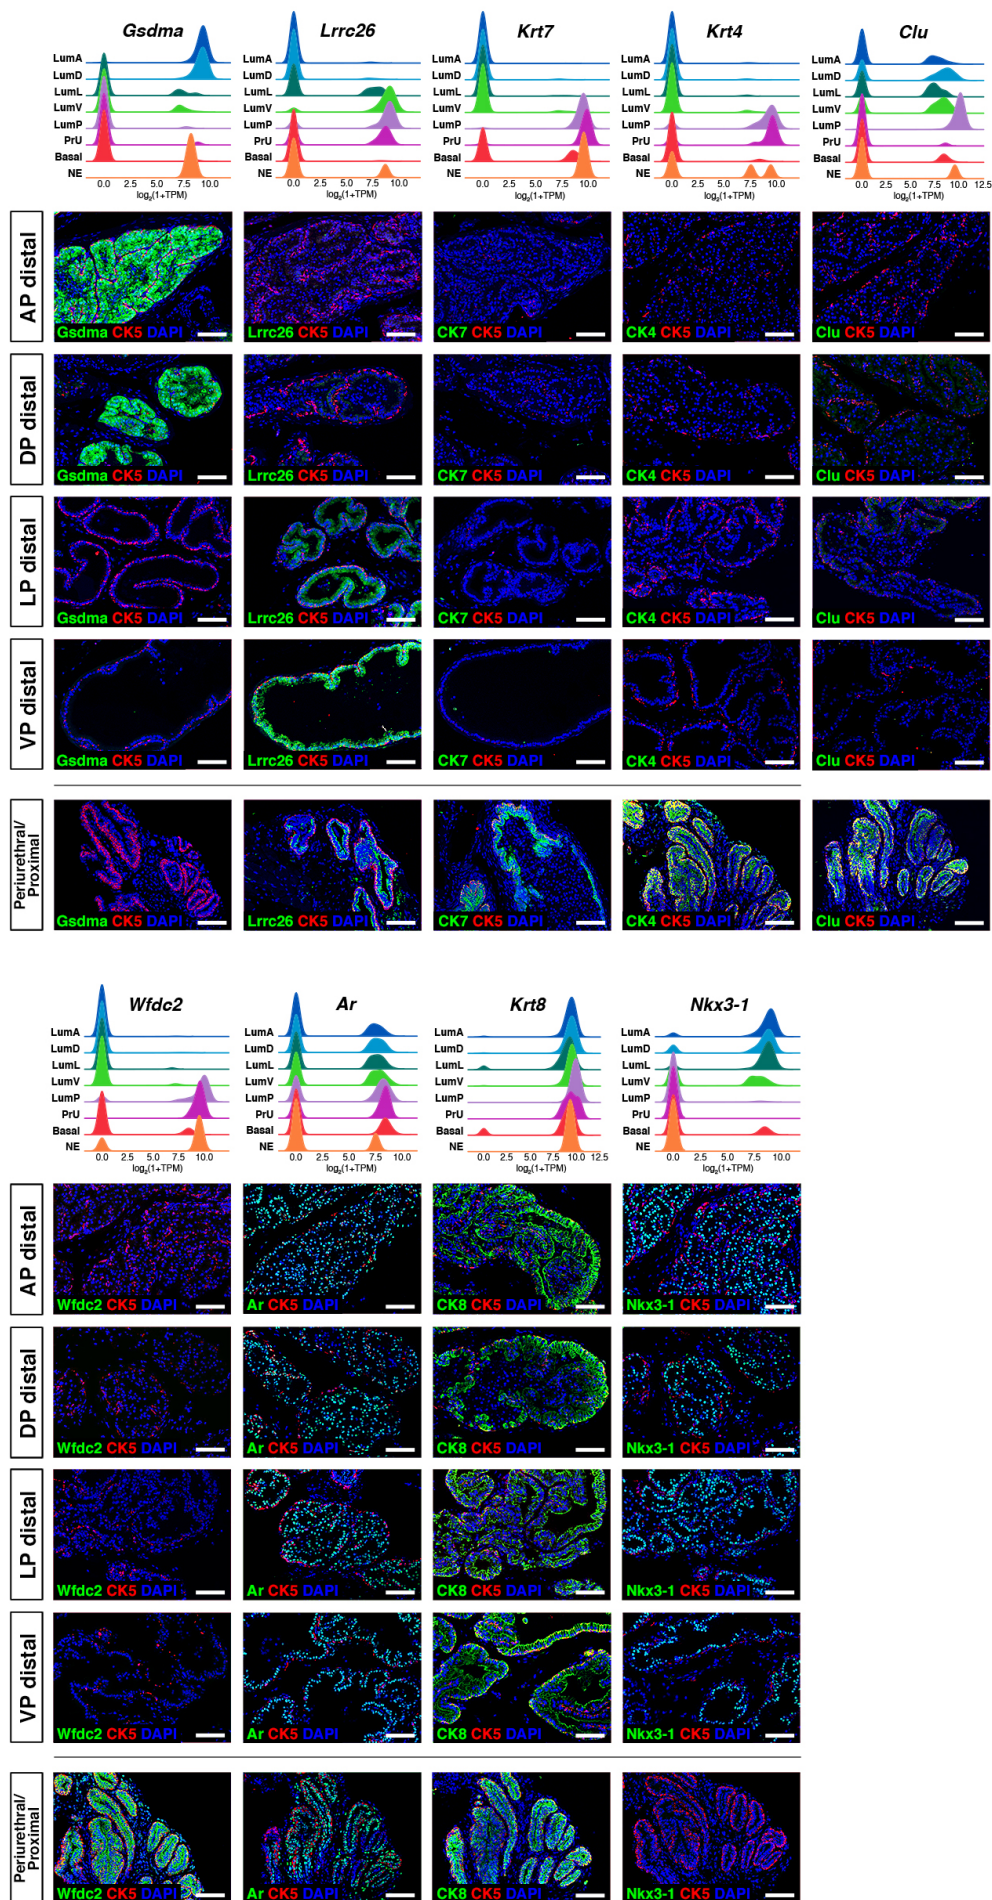

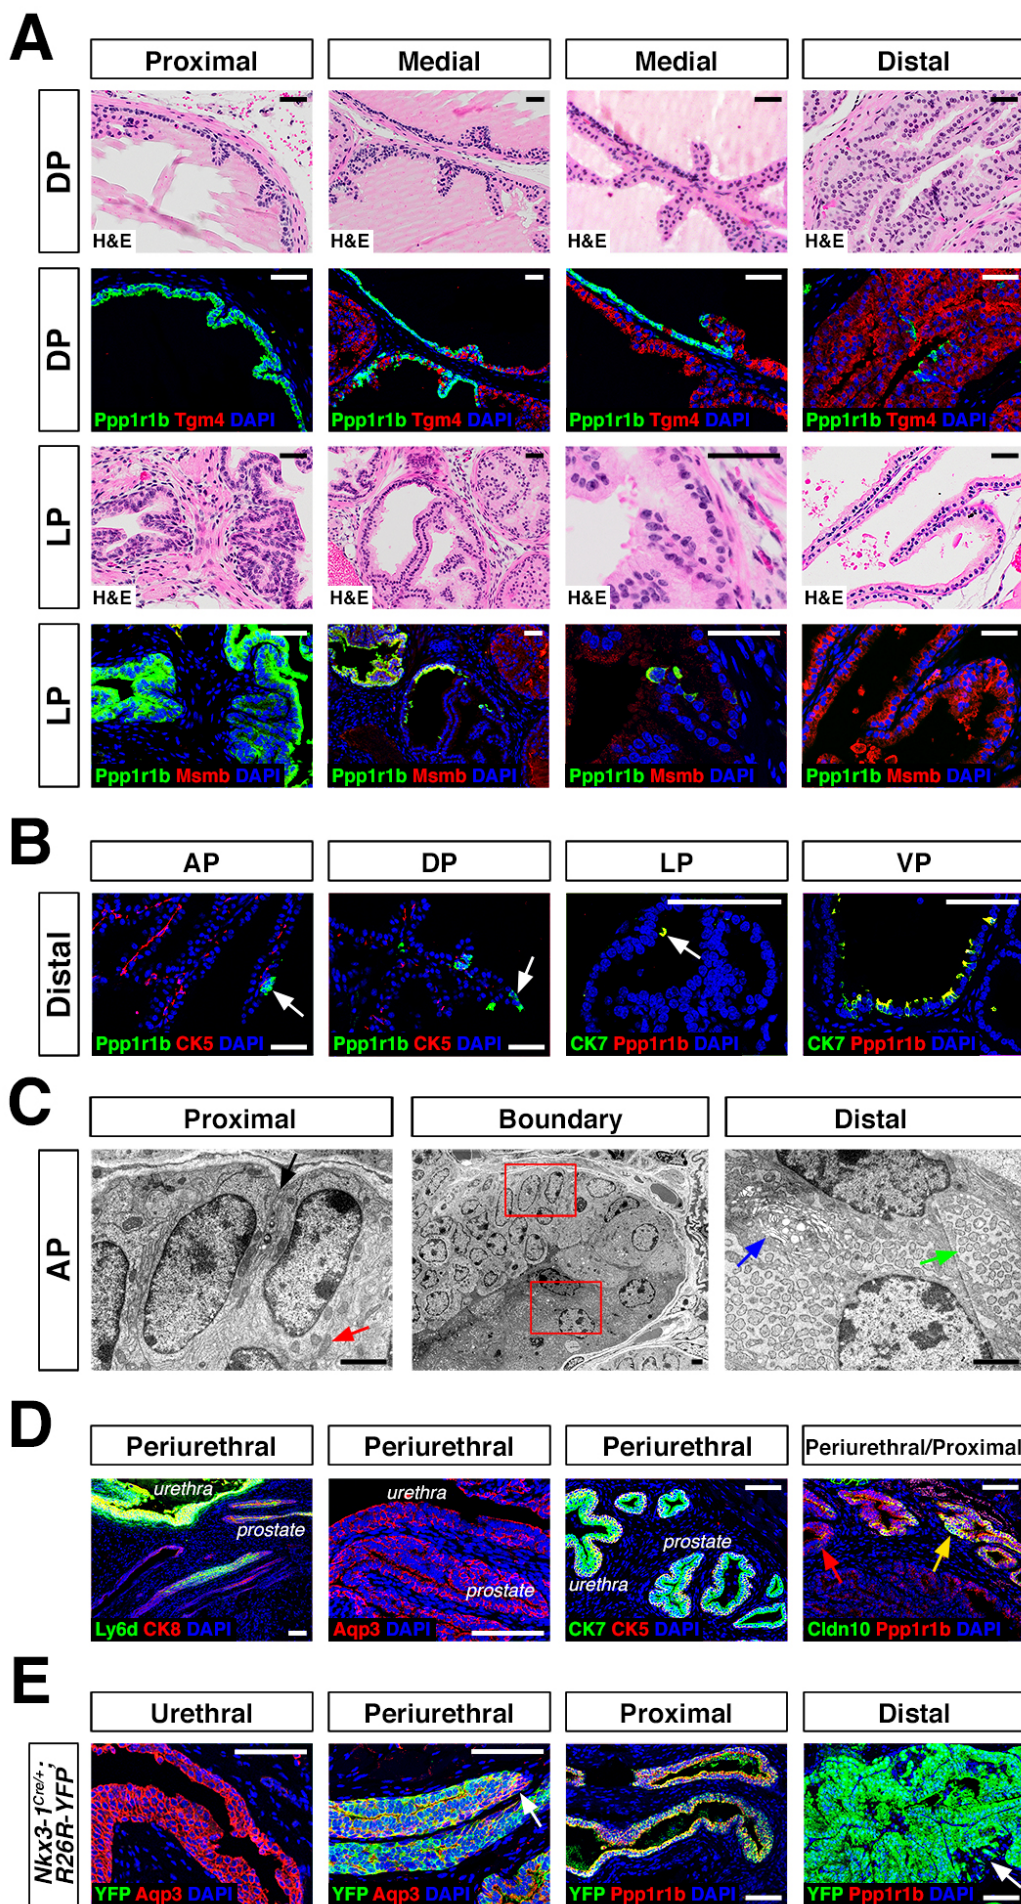

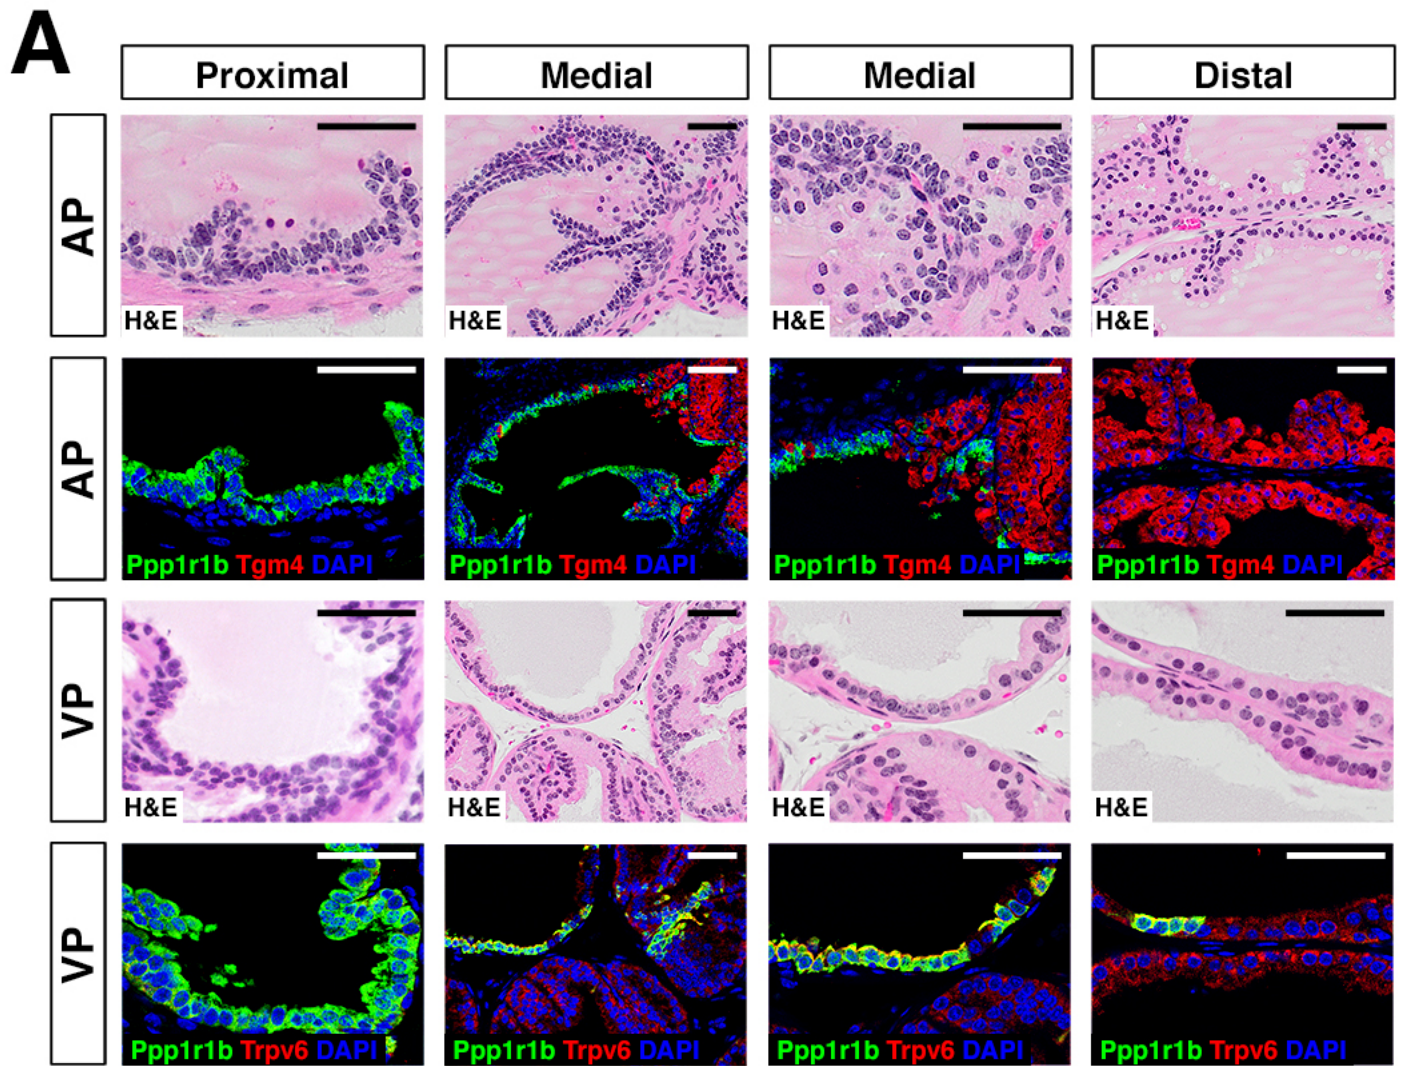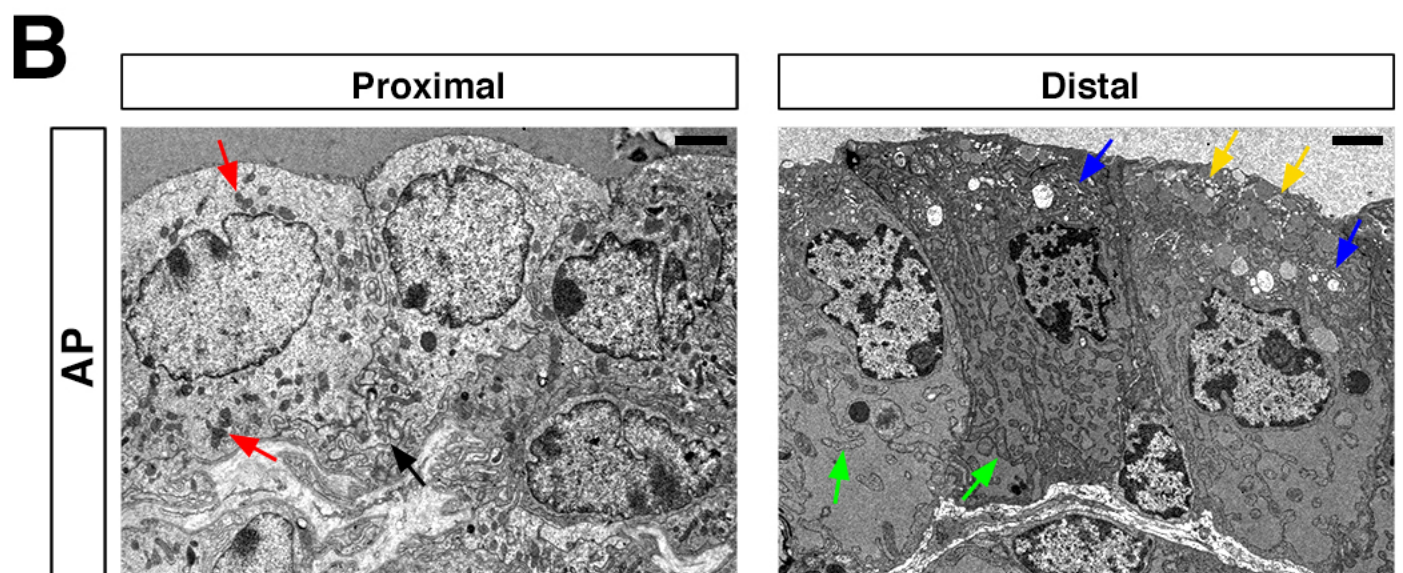

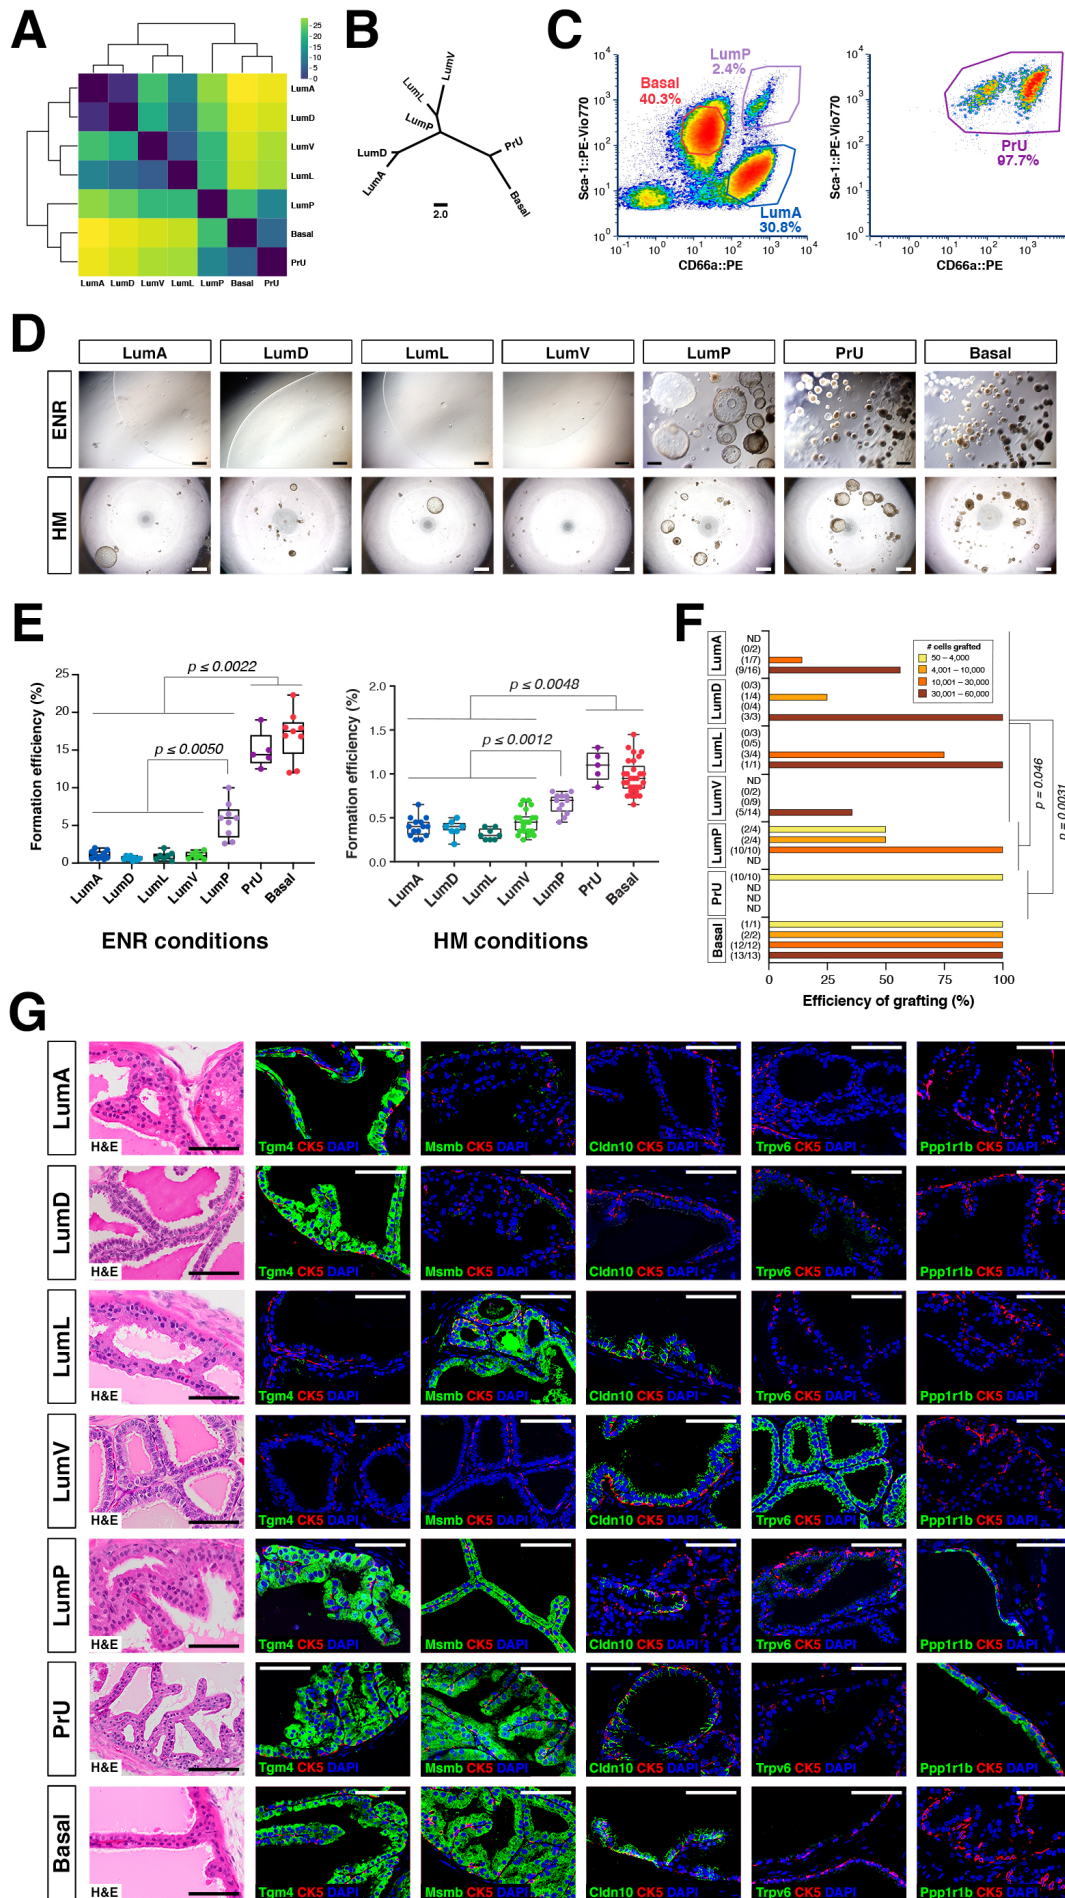

**A**

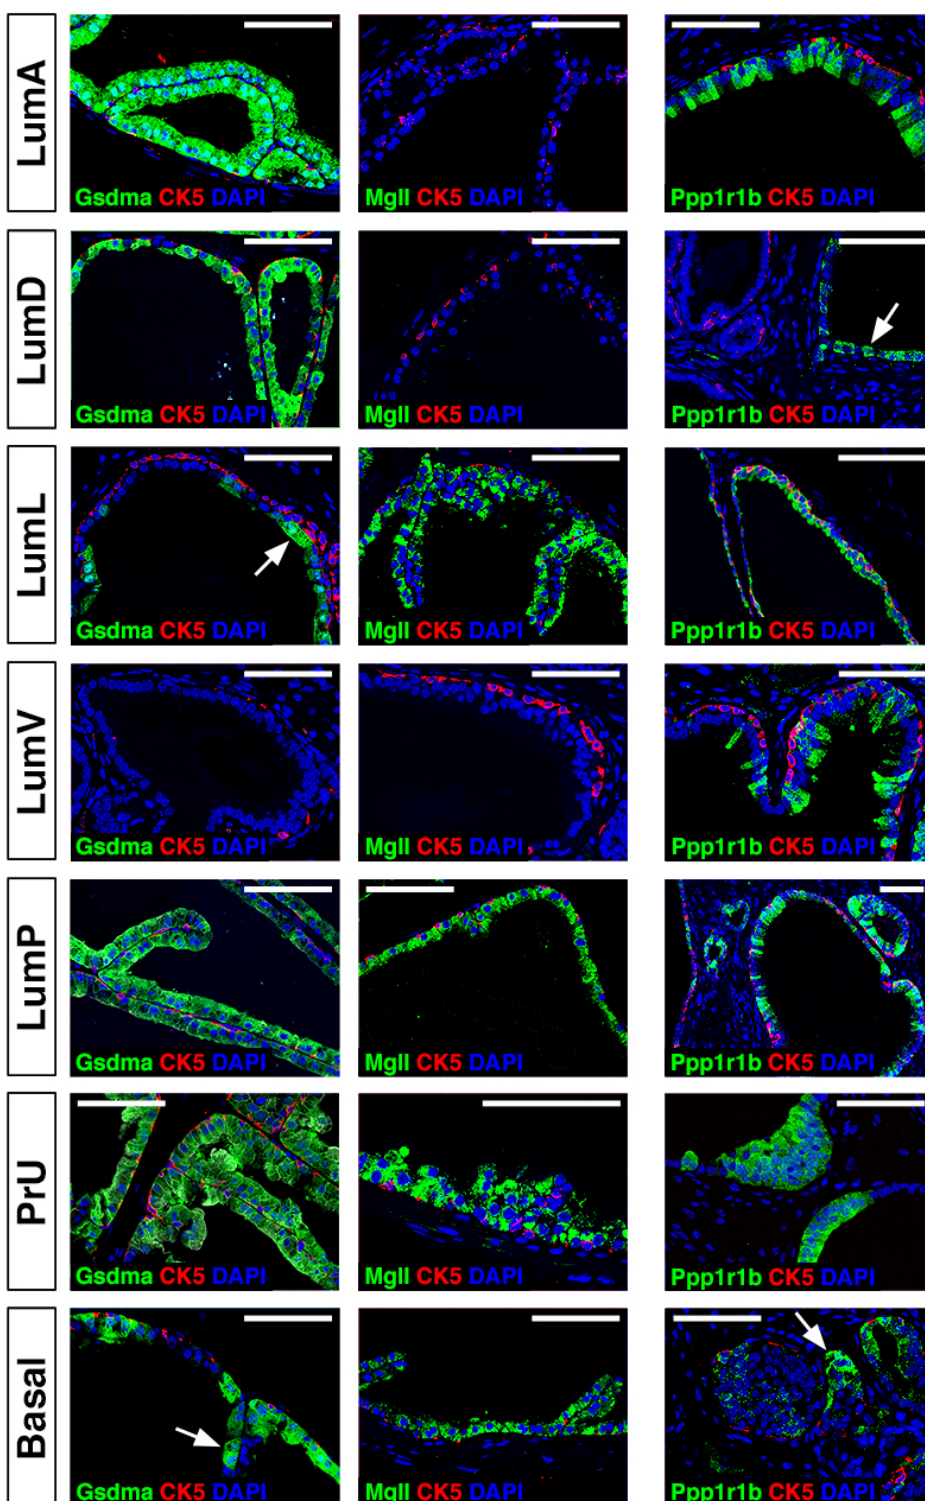

**B**

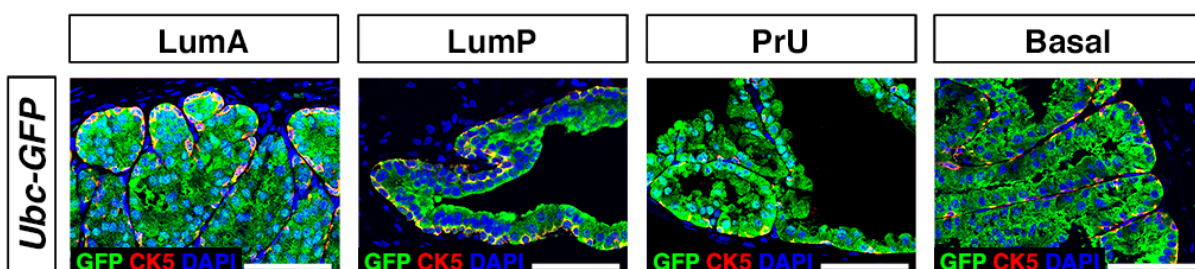

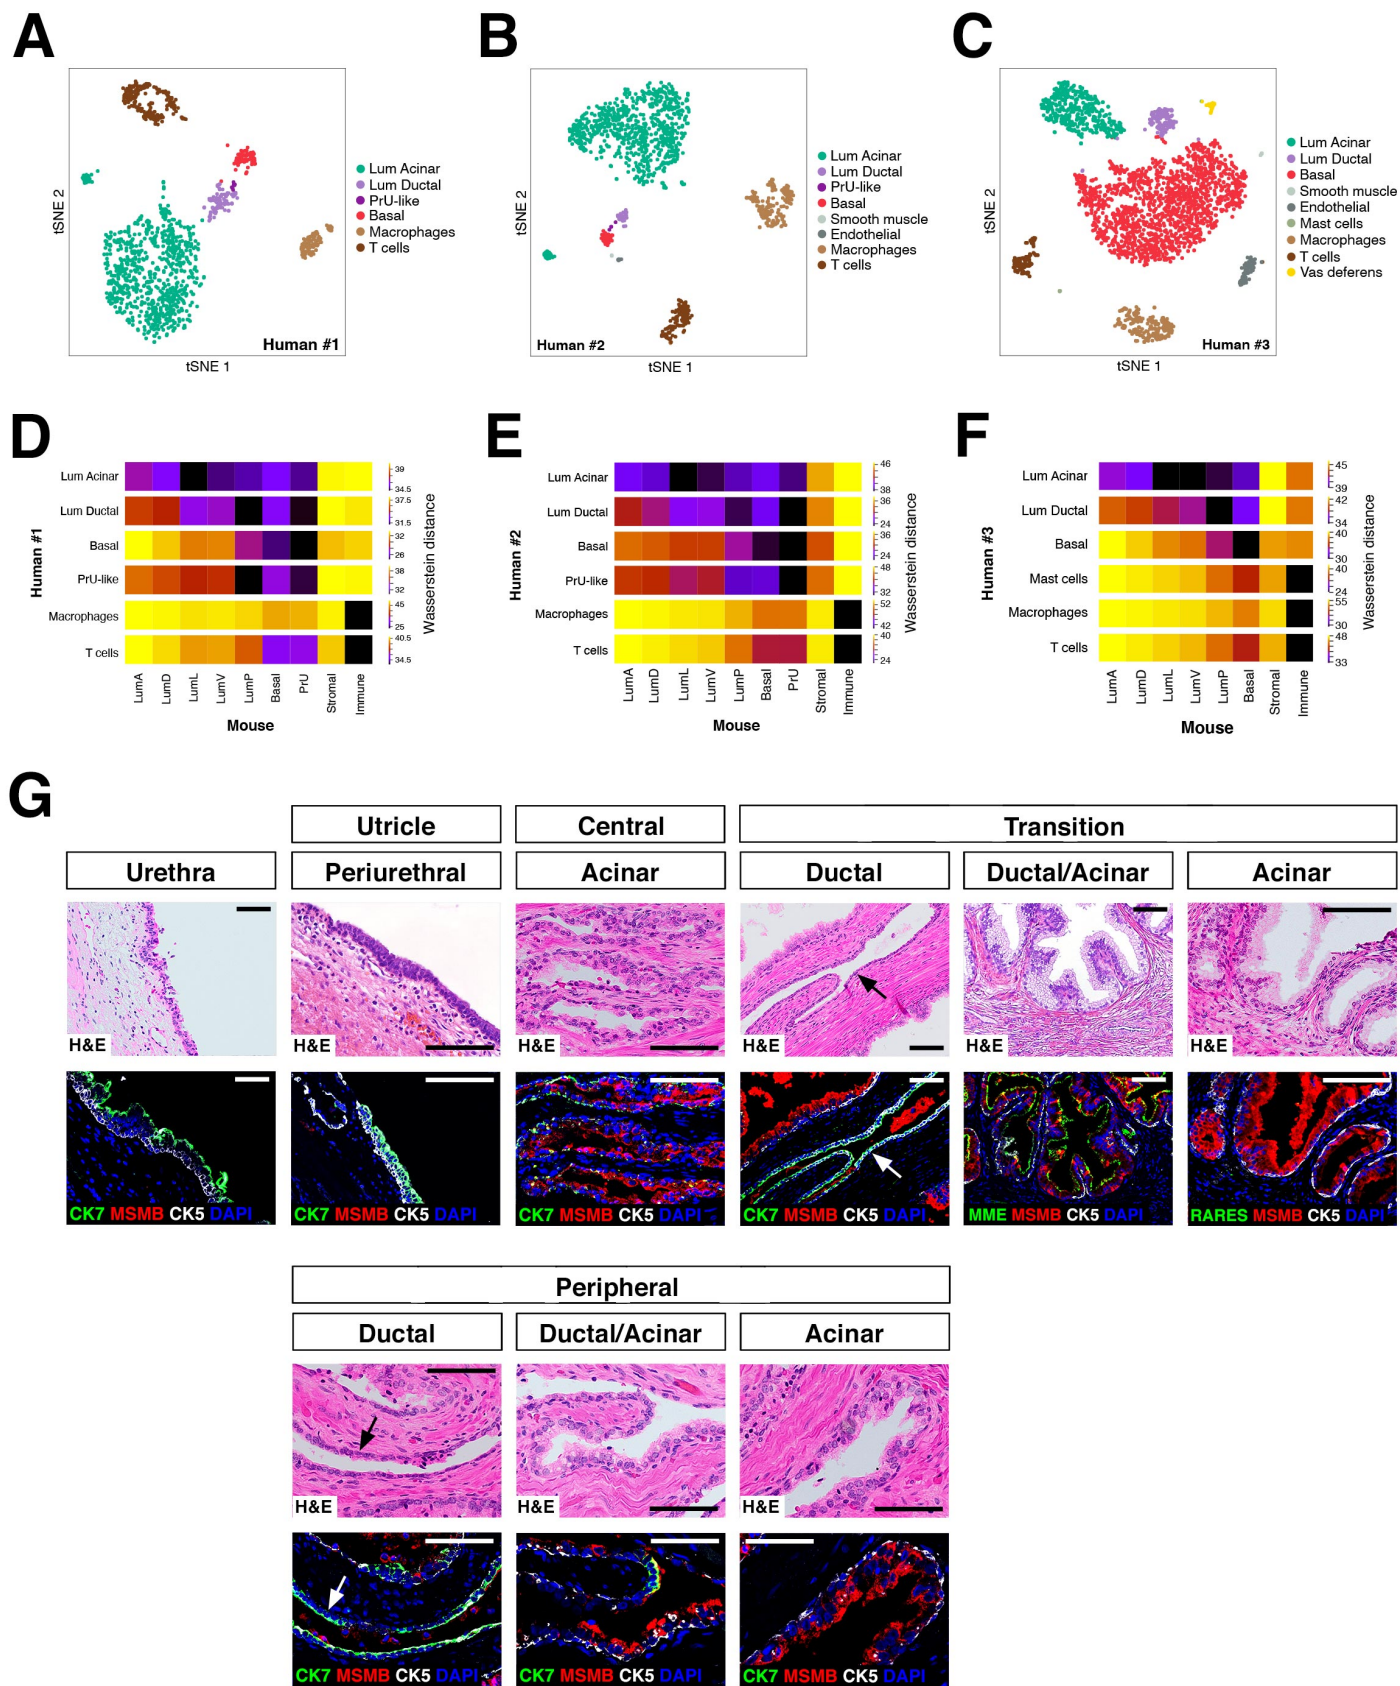

**Figure 4—source data. Human prostate samples and corresponding clinical data**

| Patient | Site     | Age | Procedure             | Overall diagnosis                                       | Pathology of sample analyzed                                | Comments                     |
|---------|----------|-----|-----------------------|---------------------------------------------------------|-------------------------------------------------------------|------------------------------|
| 1       | Columbia | 70  | Cystoprostatectomy    | High grade urothelial carcinoma of bladder              | Benign prostatic hyperplasia with granulomatous prostatitis | scRNA-seq dataset #1 (mm037) |
| 2       | Columbia | 68  | Cystoprostatectomy    | High grade urothelial carcinoma of bladder              | Benign prostatic hyperplasia with chronic inflammation      | scRNA-seq dataset #2 (mm033) |
| 3       | Columbia | 63  | Radical prostatectomy | Prostate adenocarcinoma (Gleason 3+3=6, pT2 N0)         | Benign prostate with inflammation                           | scRNA-seq dataset #3 (mf002) |
| 4       | Cornell  | 54  | Radical prostatectomy | Prostatic adenocarcinoma (Gleason 4+3=7, pT2 N0)        | Benign prostate                                             |                              |
| 5       | Cornell  | 65  | Radical prostatectomy | Prostatic adenocarcinoma (Gleason score 3+4=7, pT3a N1) | Benign prostate                                             |                              |
| 6       | Cornell  | 79  | Cystoprostatectomy    | High grade urothelial carcinoma of bladder              | Benign prostate                                             |                              |
